# Supplementary material for: Design, Synthesis and Biological Evaluation of Quinoline-8-Sulfonamides as Inhibitors of the Tumor Cell-Specific M2 Isoform of Pyruvate Kinase: Preliminary Study
Source: MDPI journal article supplement (doi:10.3390/molecules28062509), 2023-03-09
Supplement: s1 [file s1]

# Design, synthesis, and biological evaluation of quino- line-8-sulfonamides as inhibitors of the tumor cell spe- cific M2 isoform of pyruvate kinase

Krzysztof Marciniak <sup>1,\*</sup>, Artur Beberok <sup>2</sup>, Zuzanna Rzepka <sup>2</sup>, Elwira Chrobak <sup>1</sup>, Małgorzata Latocha <sup>3</sup>,  
Dorota Wrześniok <sup>2</sup>, and Stanisław Boryczka<sup>1</sup>

<sup>1</sup> Department of Organic Chemistry, Medical University of Silesia, Jagiellońska 4, 41-200 Sosnowiec, Poland

<sup>2</sup> Department of Pharmaceutical Chemistry, Jagiellońska 4, 41-200 Sosnowiec, Poland

<sup>3</sup> Department of Molecular Biology, Jagiellońska 4, 41-200 Sosnowiec, Poland

Correspondence: [kmarciniak@um.edu.pl](mailto:kmarciniak@um.edu.pl)

**Table S1.** Interaction of compounds **9a–e** with target proteins

| Protein |          | Ligand    |                       | Interaction                |                 |
|---------|----------|-----------|-----------------------|----------------------------|-----------------|
| Name    | Residue  | Name      | Residue               | Type                       | Distance<br>[Å] |
| G1N     | A:Tyr390 | <b>9a</b> | Sulfonamide oxygen    | Conventional hydrogen bond | 1.76            |
|         | B:Lys311 |           | Triazole nitrogen     | Conventional hydrogen bond | 2.67            |
|         | A:Leu353 |           | Sulfonamide nitrogen  | Conventional hydrogen bond | 2.42            |
|         | A:Ile389 |           | Sulfonamide oxygen    | Carbon hydrogen bond       | 2.75            |
|         | A:Asp354 |           | Pyridine ring C2      | Carbon hydrogen bond       | 2.29            |
|         | B:Asp354 |           | Pyridine ring C2'     | Carbon hydrogen bond       | 2.82            |
|         | A:Met30  |           | Triazole ring         | $\pi$ -Sulfur              | 4.07            |
|         | A:Phe26  |           | Benzene ring          | $\pi$ -Sulfur              | 5.89            |
|         | A:Phe26  |           | Benzene ring          | $\pi$ - $\pi$ - Stacked    | 5.36            |
|         | A:Phe26  |           | Pyridine ring         | $\pi$ - $\pi$ T-shaped     | 5.94            |
|         | A:Phe26  |           | Benzene ring          | $\pi$ - $\pi$ T-shaped     | 4.53            |
|         | A:Phe26  |           | Benzene ring          | $\pi$ - $\pi$ T-shaped     | 5.18            |
|         | A:Phe26  |           | Pyridine ring         | $\pi$ - $\pi$ T-shaped     | 5.13            |
|         | A:Leu27  |           | Chlorine atom         | Alkyl                      | 4.42            |
|         | B:Leu394 |           | Chlorine atom         | Alkyl                      | 5.43            |
|         | A:Leu394 |           | Benzene ring          | $\pi$ -Alkyl               | 4.44            |
|         | A:Leu394 |           | Pyridine ring         | $\pi$ -Alkyl               | 4.87            |
|         | B:Leu27  |           | Pyridine ring         | $\pi$ -Alkyl               | 5.36            |
|         | B:Met30  |           | Pyridine ring         | $\pi$ -Alkyl               | 5.49            |
|         | A:Leu353 |           | Triazole ring         | $\pi$ -Alkyl               | 4.41            |
|         | A:Met30  |           | Benzene ring          | $\pi$ -Alkyl               | 5.13            |
|         | A:Met30  |           | Pyridine ring         | $\pi$ -Alkyl               | 4.12            |
|         | A:Tyr390 | <b>9b</b> | Sulfonamide oxygen    | Conventional hydrogen bond | 1.97            |
|         | A:Leu353 |           | Sulfonamide oxygen    | Carbon hydrogen bond       | 2.58            |
|         | A:Ile389 |           | Sulfonamide oxygen    | Carbon hydrogen bond       | 2.35            |
|         | A:Leu353 |           | Pyridine ring C2      | Carbon hydrogen bond       | 2.70            |
|         | A:Asp354 |           | Pyridine ring C2      | Carbon hydrogen bond       | 2.27            |
|         | B:Leu353 |           | Ethyl group           | Carbon hydrogen bond       | 2.73            |
|         | A:Phe26  |           | Sulfonamide sulfur    | $\pi$ -Sulfur              | 5.16            |
|         | B:Phe26  |           | Benzene ring          | $\pi$ - $\pi$ T-shaped     | 5.45            |
|         | B:Phe26  |           | Pyridine ring         | $\pi$ - $\pi$ T-shaped     | 5.14            |
|         | B:Leu394 |           | Ethyl group           | Alkyl                      | 4.66            |
|         | B:Leu394 |           | Ethyl group           | Alkyl                      | 4.87            |
|         | A:Leu394 |           | Benzene ring          | $\pi$ -Alkyl               | 4.48            |
|         | A:Leu394 |           | Pyridine ring         | $\pi$ -Alkyl               | 5.20            |
|         | A:Met30  |           | Triazole ring         | $\pi$ -Alkyl               | 4.59            |
|         | A:Leu353 |           | Triazole ring         | $\pi$ -Alkyl               | 5.44            |
|         | B:Lys311 |           | Triazole ring         | $\pi$ -Alkyl               | 4.86            |
|         | B:Lys311 | <b>9c</b> | Sulfonamide oxygen    | Conventional hydrogen bond | 1.95            |
|         | B:Leu394 |           | Ester carbonyl oxygen | Carbon hydrogen bond       | 2.42            |
|         | A:Leu353 |           | Benzene ring          | $\pi$ -Sigma               | 2.47            |
|         | A:Met30  |           | Triazole ring         | $\pi$ -Sulfur              | 4.82            |
|         | A:Phe26  |           | Triazole ring         | $\pi$ - $\pi$ -Stacked     | 3.16            |
|         | A:Phe26  |           | Benzene ring          | $\pi$ - $\pi$ T-shaped     | 4.80            |
|         | B:Phe26  |           | Triazole ring         | $\pi$ - $\pi$ T-shaped     | 5.38            |
|         | A:Leu27  |           | Ethyl group           | Alkyl                      | 4.64            |

|  |          |                          |                            |      |
|--|----------|--------------------------|----------------------------|------|
|  | B:Leu394 | Ethyl group              | Alkyl                      | 5.44 |
|  | A:Leu353 | Pyridine ring            | $\pi$ -Alkyl               | 3.97 |
|  | B:Lys311 | Sulfonamide oxygen       | Conventional Hydrogen Bond | 1.83 |
|  | A:Met30  | Triazole ring            | $\pi$ -Sulfur              | 4.95 |
|  | A:Phe26  | Triazole ring            | $\pi$ - $\pi$ -Stacked     | 3.33 |
|  | A:Phe26  | Benzene ring             | $\pi$ - $\pi$ T-shaped     | 5.01 |
|  | A:Phe26  | Pyridine ring            | $\pi$ - $\pi$ T-shaped     | 5.21 |
|  | B:Phe26  | Triazole ring            | $\pi$ - $\pi$ T-shaped     | 5.37 |
|  | B:Ile389 | Butyl group              | Alkyl                      | 4.77 |
|  | B:Leu394 | Butyl group              | Alkyl                      | 4.07 |
|  | A:Leu353 | Benzene ring             | $\pi$ -Alkyl               | 3.79 |
|  | A:Leu353 | Pyridine ring            | $\pi$ -Alkyl               | 4.37 |
|  | A:Lys311 | Ester carbonyl oxygen    | Conventional hydrogen bond | 1.55 |
|  | A:Leu353 | Betuline C29*            | Carbon hydrogen bond       | 2.01 |
|  | A:Leu353 | Betuline C29'            | Carbon hydrogen bond       | 1.87 |
|  | B:Asn350 | Betuline C28'            | Carbon hydrogen bond       | 2.16 |
|  | A:Gln393 | Sulfonamide methyl group | Carbon hydrogen bond       | 2.32 |
|  | A:Leu394 | Pyridine ring            | $\pi$ -Sigma               | 2.26 |
|  | B:Met30  | Triazole ring            | $\pi$ -Sulfur              | 5.70 |
|  | B:Met30  | Benzene ring             | $\pi$ -Sulfur              | 4.13 |
|  | B:Met30  | Pyridine ring            | $\pi$ -Sulfur              | 5.67 |
|  | B:Phe26  | Sulfonamide sulfur       | $\pi$ -Sulfur              | 5.76 |
|  | B:Leu353 | Betuline C15'            | Alkyl                      | 5.29 |
|  | B:Leu394 | Betuline C1'             | Alkyl                      | 5.45 |
|  | A:Leu353 | Betuline C21'            | Alkyl                      | 4.30 |
|  | A:Leu27  | Betuline C23'            | Alkyl                      | 4.84 |
|  | B:Leu394 | Betuline C23'            | Alkyl                      | 3.82 |
|  | B:Leu394 | Betuline C24'            | Alkyl                      | 3.02 |
|  | B:Leu353 | Betuline C25'            | Alkyl                      | 4.79 |
|  | A:Met30  | Betuline C27'            | Alkyl                      | 4.61 |
|  | A:Leu353 | Betuline C30'            | Alkyl                      | 3.44 |
|  | A:Phe26  | Betuline C1'             | $\pi$ -Alkyl               | 4.90 |
|  | A:Phe26  | Betuline C11'            | $\pi$ -Alkyl               | 4.81 |
|  | B:Phe26  | Betuline C12'            | $\pi$ -Alkyl               | 4.72 |
|  | B:Phe26  | Betuline C25'            | $\pi$ -Alkyl               | 4.35 |
|  | B:Phe26  | Betuline C26'            | $\pi$ -Alkyl               | 4.76 |
|  | A:Leu394 | Benzene ring             | $\pi$ -Alkyl               | 4.88 |
|  | B:Leu27  | Benzene ring             | $\pi$ -Alkyl               | 5.08 |
|  | A:Arg120 | Sulfonamide oxygen       | Conventional hydrogen bond | 2.82 |
|  | A:Arg120 | Sulfonamide oxygen       | Conventional hydrogen bond | 1.67 |
|  | A:Lys207 | Triazole nitrogen        | Conventional hydrogen bond | 2.10 |
|  | A:His78  | Sulfonamide nitrogen     | Conventional hydrogen bond | 2.73 |
|  | A:Asp177 | Pyridine ring C2         | Carbon hydrogen bond       | 2.65 |
|  | A:Asp178 | Benzene ring             | $\pi$ -Anion               | 3.21 |
|  | A:Asp178 | Pyridine ring            | $\pi$ -Anion               | 2.64 |
|  | A:His78  | Sulfonamide sulfur       | $\pi$ -Sulfur              | 5.74 |
|  | A:His78  | Triazole ring            | $\pi$ - $\pi$ -Stacked     | 3.29 |
|  | A:His78  | Pyridine ring            | $\pi$ - $\pi$ -Stacked     | 4.47 |
|  | A:His78  | Benzene ring             | $\pi$ - $\pi$ -Stacked     | 4.43 |
|  | A:Tyr83  | Chlorine atom            | $\pi$ -Alkyl               | 4.41 |
|  | A:Pro53  | Pyridine ring            | $\pi$ -Alkyl               | 5.19 |
|  | A:Ala366 | Pyridine ring            | $\pi$ -Alkyl               | 4.66 |

|          |           |                       |                            |      |
|----------|-----------|-----------------------|----------------------------|------|
| A:Pro53  |           | Benzene ring          | $\pi$ -Alkyl               | 4.93 |
| A:Arg73  |           | Phosphonate oxygen    | Conventional hydrogen bond | 1.81 |
| A:Arg73  |           | Phosphonate oxygen    | Conventional hydrogen bond | 3.09 |
| A:Ser205 |           | Sulfonamide oxygen    | Conventional hydrogen bond | 3.03 |
| A:Ser205 |           | Sulfonamide oxygen    | Conventional hydrogen bond | 2.63 |
| A:Lys207 |           | Sulfonamide oxygen    | Carbon hydrogen bond       | 2.15 |
| A:Arg120 |           | Triazole ring         | $\pi$ -Cation              | 4.00 |
| A:His78  |           | Pyridine ring         | $\pi$ - $\pi$ -Stacked     | 3.62 |
| A:His78  |           | Benzene ring          | $\pi$ - $\pi$ -Stacked     | 3.57 |
| A:His78  | <b>9b</b> | Triazole ring         | $\pi$ - $\pi$ -Stacked     | 5.30 |
| A:Ala293 |           | Ethyl                 | Alkyl                      | 4.06 |
| A:Ala327 |           | Ethyl                 | Alkyl                      | 4.34 |
| A:Met291 |           | Ethyl                 | Alkyl                      | 4.76 |
| A:Met360 |           | Ethyl                 | Alkyl                      | 5.24 |
| A:Phe244 |           | Ethyl                 | $\pi$ -Alkyl               | 5.26 |
| A:Pro53  |           | Pyridine ring         | $\pi$ -Alkyl               | 5.44 |
| A:Ala366 |           | Benzene ring          | $\pi$ -Alkyl               | 4.83 |
| A:Arg73  |           | Ester carbonyl oxygen | Conventional hydrogen bond | 2.09 |
| A:Arg73  |           | Triazole nitrogen     | Conventional hydrogen bond | 1.65 |
| A:Arg73  |           | Ester carbonyl oxygen | Conventional hydrogen bond | 2.86 |
| A:Arg120 |           | Ester oxygen          | Conventional hydrogen bond | 2.73 |
| A:Lys207 |           | Sulfonamide oxygen    | Conventional hydrogen bond | 2.38 |
| A:His78  |           | Sulfonamide nitrogen  | Conventional hydrogen bond | 2.86 |
| A:Asn75  |           | Ethyl group           | Carbon hydrogen bond       | 2.15 |
| A:Asp113 | <b>9c</b> | Ethyl group           | Carbon hydrogen bond       | 3.07 |
| A:Asp113 |           | Ethyl group           | Carbon hydrogen bond       | 2.63 |
| A:His78  |           | Sulfonamide sulfur    | $\pi$ -Sulfur              | 4.43 |
| A:His78  |           | Pyridine ring         | $\pi$ - $\pi$ -Stacked     | 3.97 |
| A:His78  |           | Benzene ring          | $\pi$ - $\pi$ -Stacked     | 4.93 |
| A:Pro53  |           | Pyridine ring         | $\pi$ -Alkyl               | 5.19 |
| A:Pro53  |           | Benzene ring          | $\pi$ -Alkyl               | 4.62 |
| A:Ala366 |           | Pyridine ring         | $\pi$ -Alkyl               | 5.23 |
| A:Arg73  | <b>9d</b> | Triazole nitrogen     | Conventional hydrogen bond | 2.70 |
| A:Arg73  |           | Triazole nitrogen     | Conventional hydrogen bond | 2.05 |
| A:Lys207 |           | Sulfonamide oxygen    | Conventional hydrogen bond | 1.72 |
| A:His78  |           | Sulfonamide nitrogen  | Conventional hydrogen bond | 2.02 |
| A:His78  |           | Sulfonamide oxygen    | Carbon hydrogen bond       | 2.95 |
| A:His78  |           | Methylene linker      | Carbon hydrogen bond       | 2.92 |
| A:His78  |           | Benzene ring          | $\pi$ - $\pi$ -Stacked     | 3.14 |
| A:His78  |           | Pyridine ring         | $\pi$ - $\pi$ -Stacked     | 3.80 |
| A:Phe244 |           | Butyl group           | $\pi$ -Alkyl               | 5.39 |
| A:Ala366 |           | Pyridine ring         | $\pi$ -Alkyl               | 4.77 |
| A:Lys367 |           | Triazole nitrogen     | Conventional hydrogen bond | 2.22 |
| B:Lys337 |           | Sulfonamide oxygen    | Carbon hydrogen bond       | 2.89 |
| A:Thr129 |           | Betuline C33'         | Carbon hydrogen bond       | 2.20 |
| A:Lys367 |           | Triazole nitrogen     | Carbon hydrogen bond       | 2.53 |
| A:Asp177 | <b>9e</b> | Betuline C29'         | Carbon hydrogen bond       | 2.82 |
| A:Glu332 |           | Betuline C29'         | Carbon hydrogen bond       | 3.07 |
| A:Asp178 |           | Betuline C28'         | Carbon hydrogen bond       | 2.64 |
| A:Glu332 |           | Triazole carbon       | Carbon hydrogen bond       | 2.71 |
| B:Lys337 |           | Benzene ring          | $\pi$ -Cation              | 3.55 |
| B:Lys337 |           | Pyridine ring         | $\pi$ -Cation              | 3.99 |



|          |               |              |      |
|----------|---------------|--------------|------|
| A:His78  | Betuline C6'  | $\pi$ -Sigma | 2.09 |
| A:Pro53  | Betuline C1'  | Alkyl        | 4.93 |
| A:Ala366 | Betuline C27' | Alkyl        | 3.82 |
| A:Lys367 | Betuline C1'  | Alkyl        | 4.80 |
| A:Lys367 | Betuline C10' | Alkyl        | 5.44 |
| A:Lys367 | Betuline C11' | Alkyl        | 4.80 |
| A:Pro53  | Betuline C23' | Alkyl        | 3.90 |
| A:Ile335 | Betuline C30' | Alkyl        | 4.04 |
| A:His78  | Betuline C5'  | $\pi$ -Alkyl | 4.85 |
| A:His78  | Betuline C24' | $\pi$ -Alkyl | 3.86 |
| A:His78  | Betuline C25' | $\pi$ -Alkyl | 3.36 |
| A:His78  | Betuline C26' | $\pi$ -Alkyl | 3.33 |
| A:Ile335 | Triazole ring | $\pi$ -Alkyl | 4.94 |
| B:Lys337 | Benzene ring  | $\pi$ -Alkyl | 5.08 |
| B:Lys336 | Pyridine ring | $\pi$ -Alkyl | 4.84 |

## Compound Spectrum List Report

### Analysis Info

Analysis Name D:\Data\Service\_20220831\8QSAProp2.d  
Method low\_mass.m  
Sample Name tune\_poshigh\_test1  
Comment

Acquisition Date 9/13/2022 1:13:51 PM

Operator KM  
Instrument impact II 1825265.10082

### Acquisition Parameter

|             |          |                      |          |                  |           |
|-------------|----------|----------------------|----------|------------------|-----------|
| Source Type | ESI      | Ion Polarity         | Positive | Set Nebulizer    | 0.3 Bar   |
| Focus       | Active   | Set Capillary        | 4000 V   | Set Dry Heater   | 200 °C    |
| Scan Begin  | 100 m/z  | Set End Plate Offset | -500 V   | Set Dry Gas      | 3.0 l/min |
| Scan End    | 1000 m/z | Set Charging Voltage | 2000 V   | Set Divert Valve | Source    |
|             |          | Set Corona           | 0 nA     | Set APCI Heater  | 0 °C      |

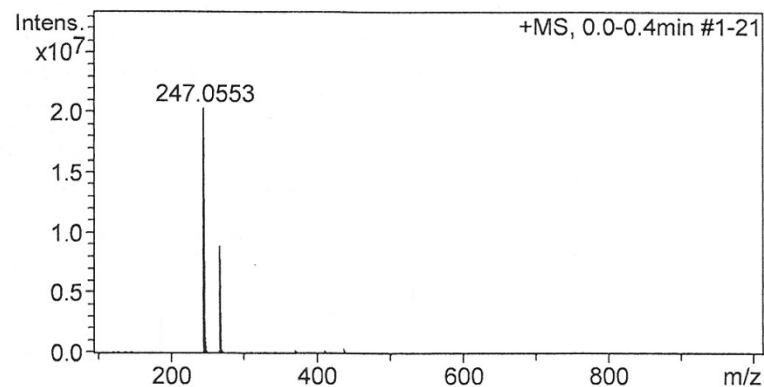

| # | m/z      | Res.  | S/N     | I        | I %   | FWHM   |
|---|----------|-------|---------|----------|-------|--------|
| 1 | 247.0553 | 15207 | 81856.7 | 20377568 | 100.0 | 0.0162 |
| 2 | 269.0362 | 36498 | 31220.0 | 8915149  | 43.7  | 0.0074 |

**Figure S1.** HR MS spectra of 8-*N*-(prop-2-ynyl)quinolinesulfonamide (**8a**)

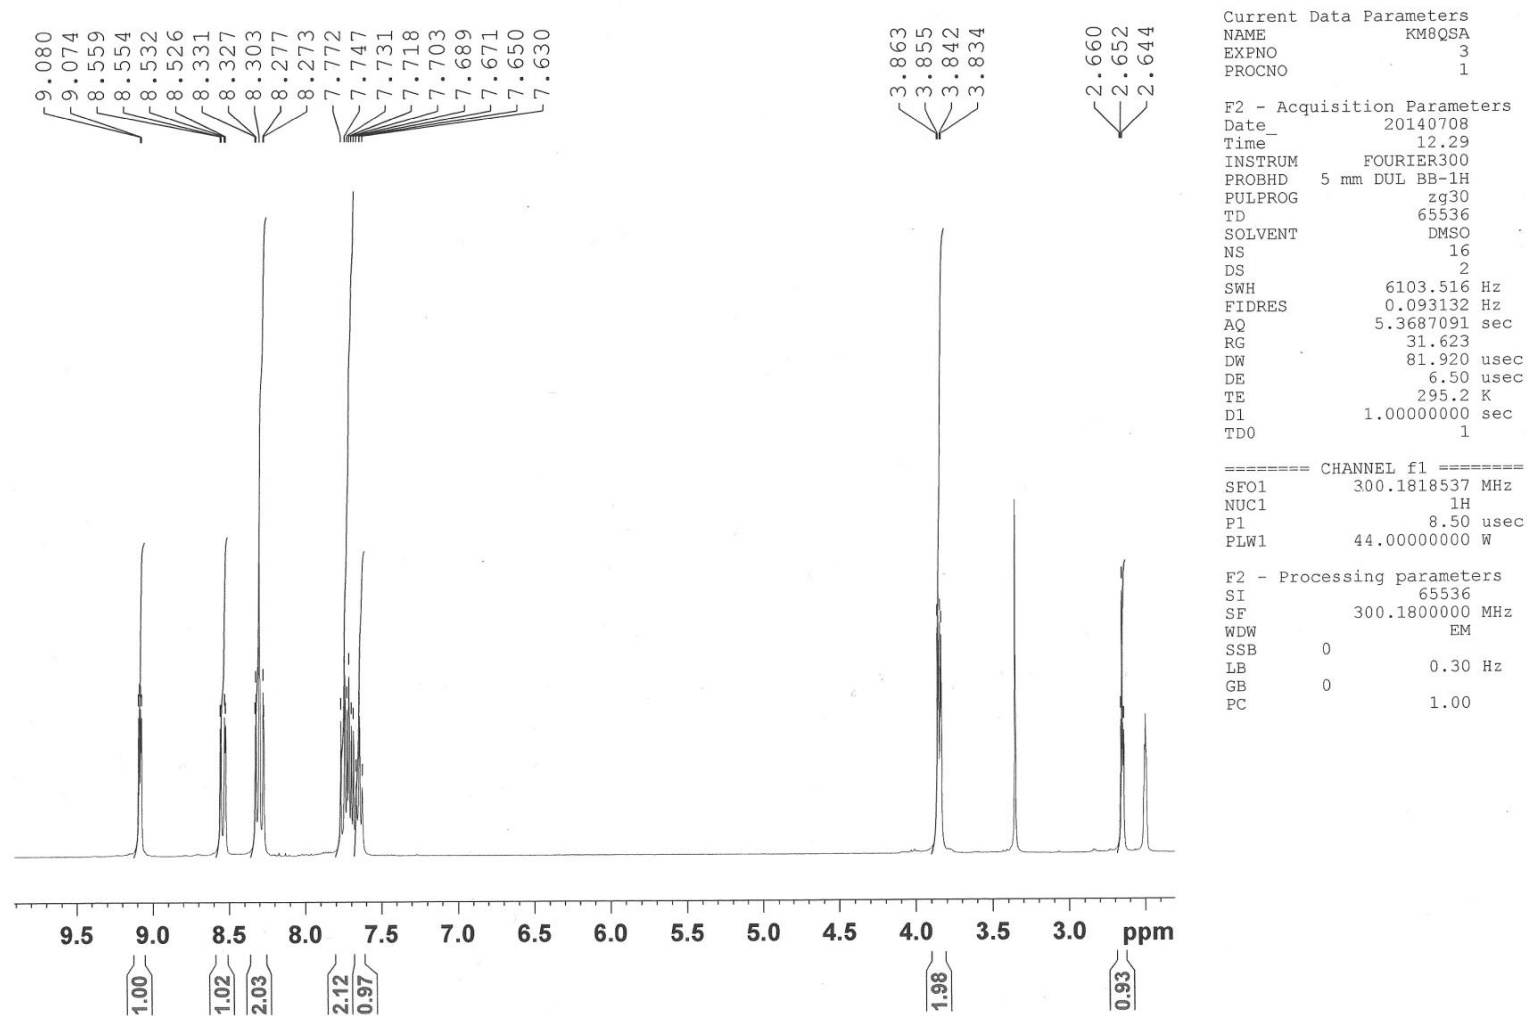

**Figure S2.**  $^1\text{H}$  NMR spectra of 8-*N*-(prop-2-ynyl)quinolinesulfonamide (**8a**)

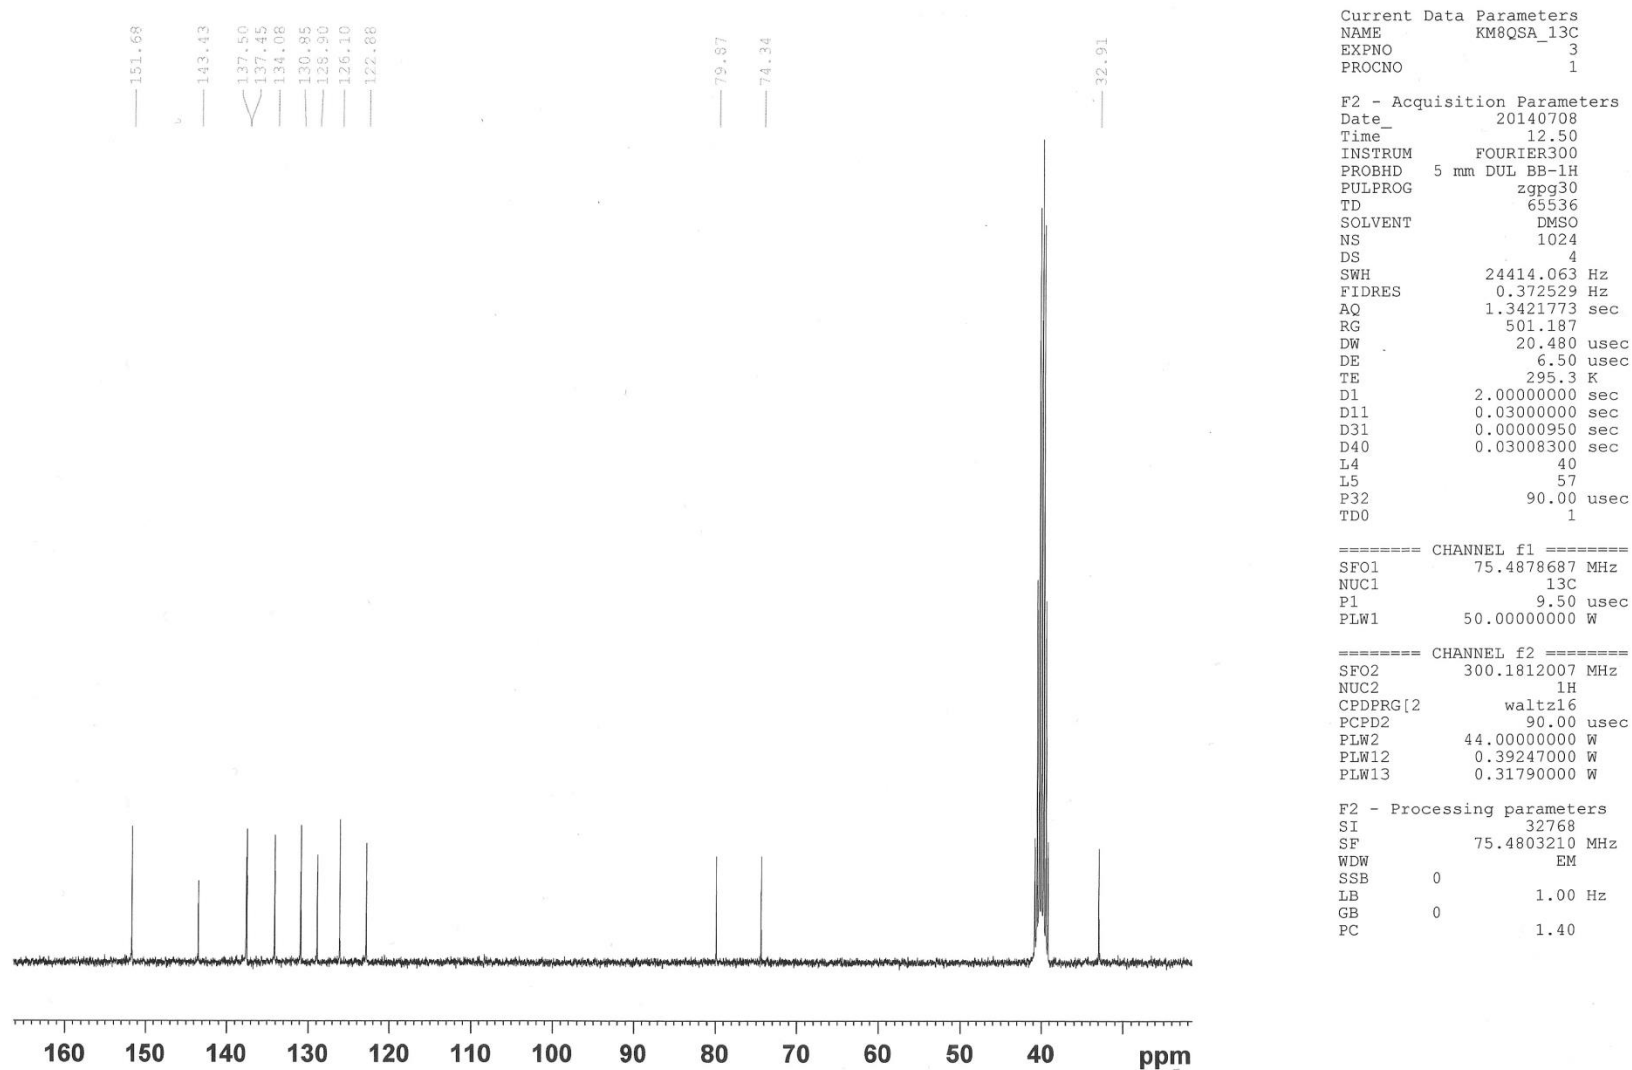

**Figure S3.**  $^{13}\text{C}$  NMR spectra of 8-*N*-(prop-2-ynyl)quinolinesulfonamide (**8a**)

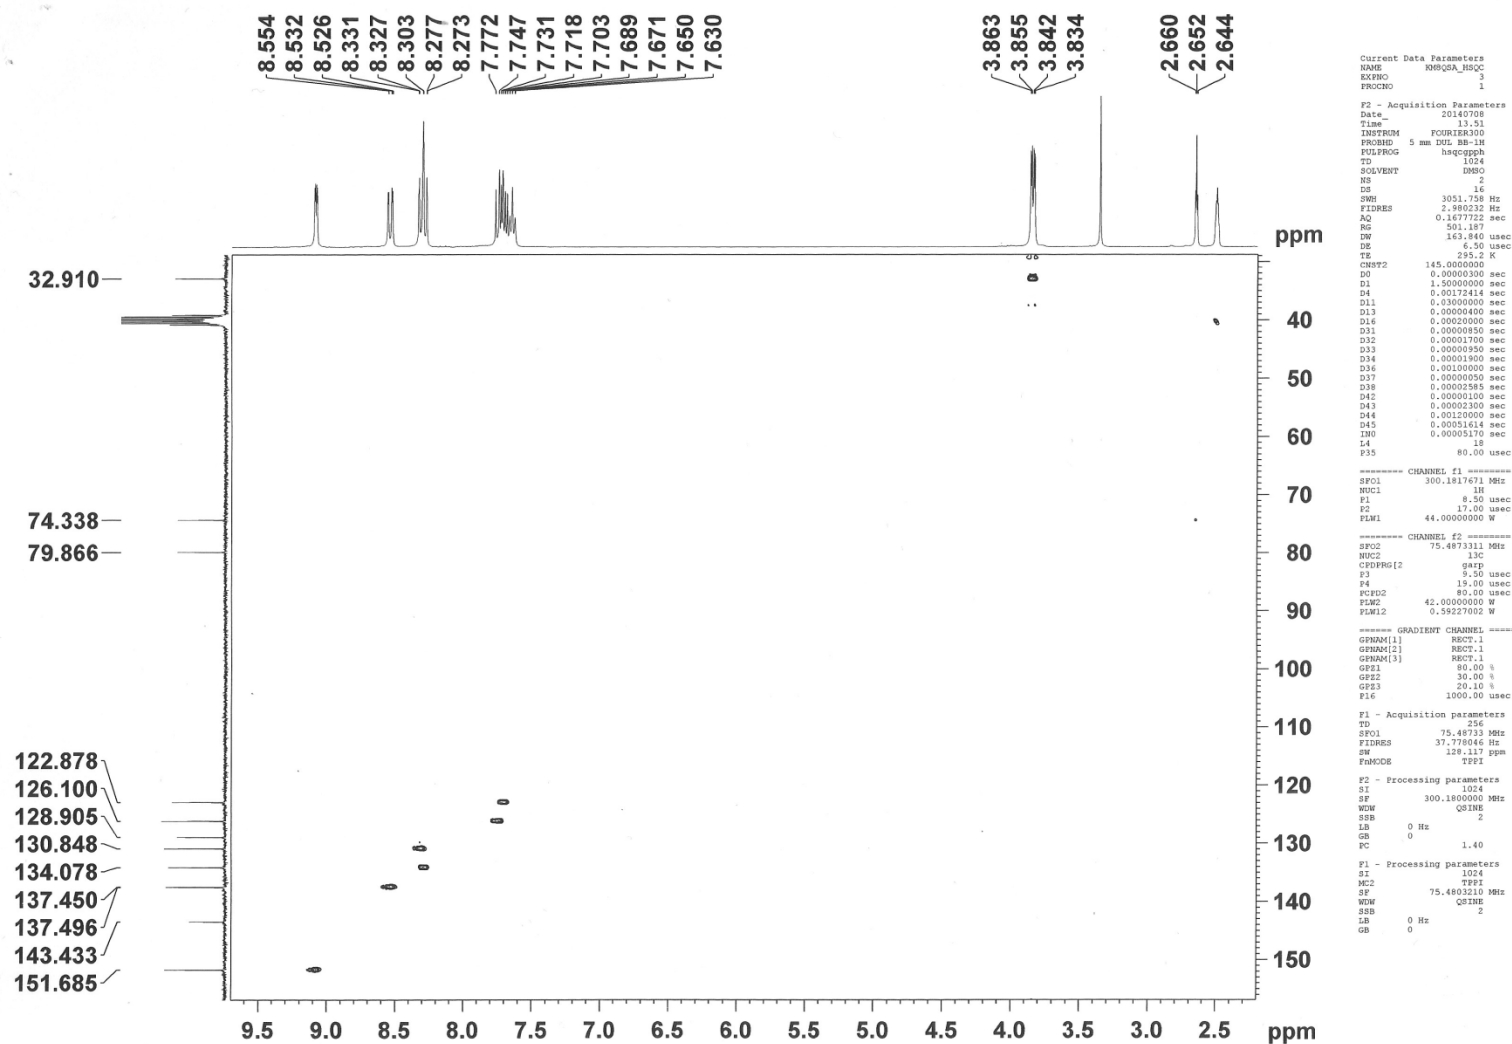

Figure S4. HSQC spectra of 8-N-(prop-2-ynyl)quinolinesulfonamide (8a)

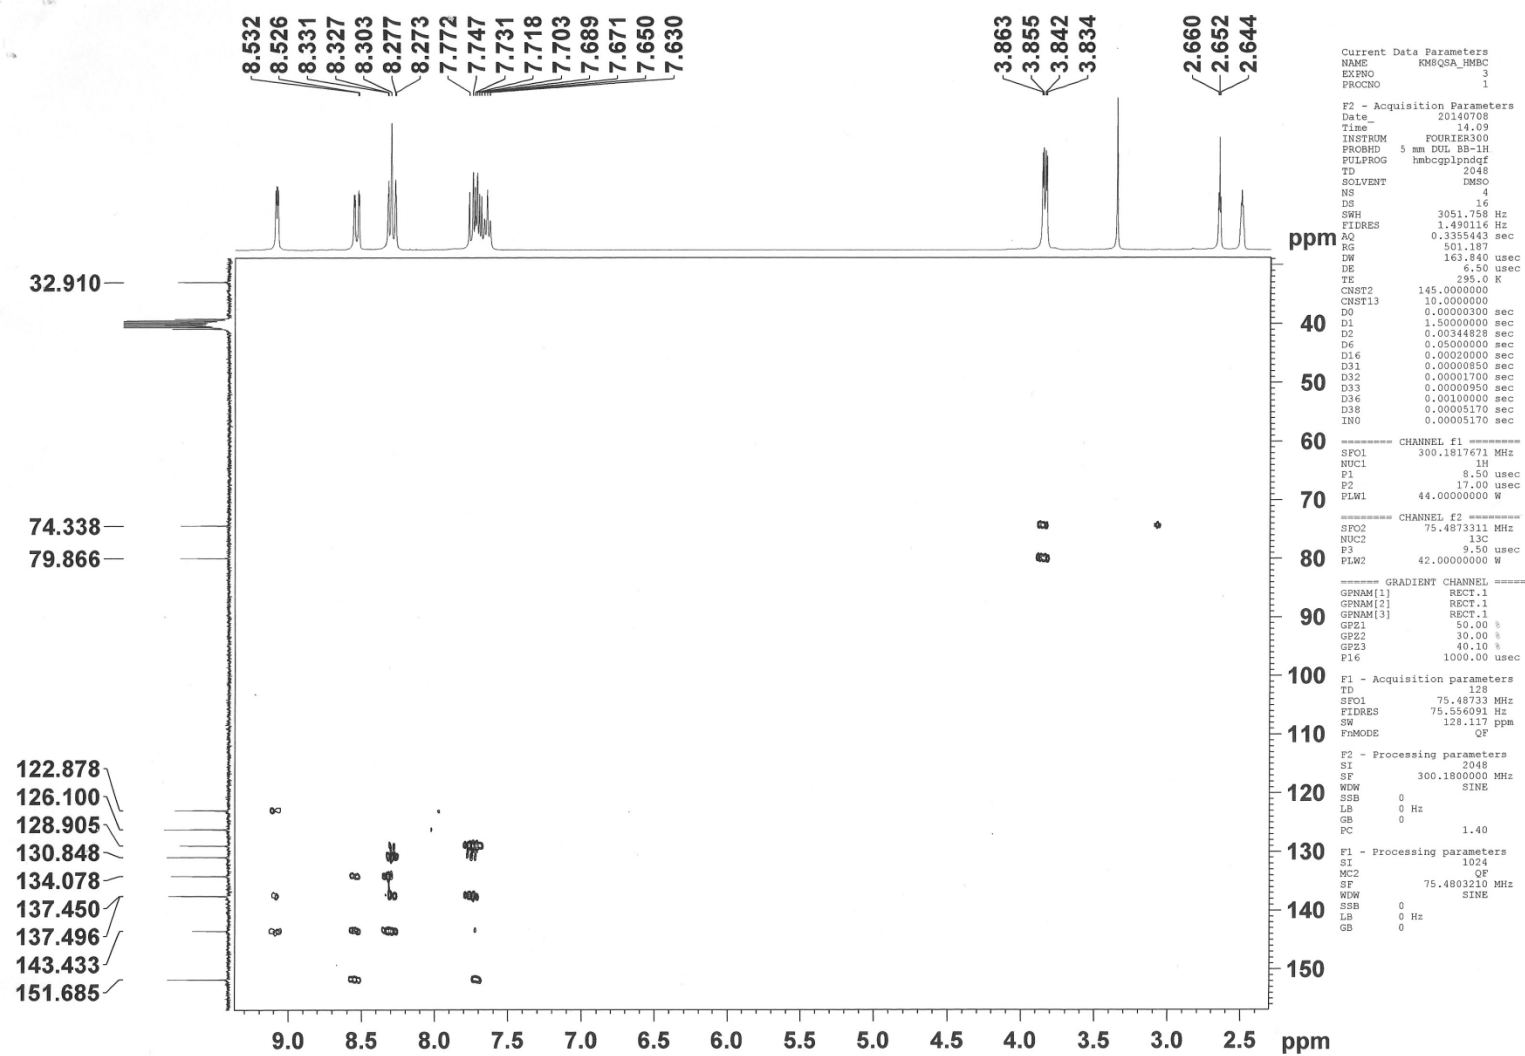

Figure S5. HMBC spectra of 8-N-(prop-2-ynyl)quinolinesulfonamide (8a)

## Compound Spectrum List Report

### Analysis Info

Analysis Name D:\Data\Service\_20220831\8QSAProp.d  
Method low\_mass.m  
Sample Name tune\_poshigh\_test1  
Comment

Acquisition Date 9/13/2022 1:03:48 PM

Operator KM  
Instrument impact II 1825265.10082

### Acquisition Parameter

|             |          |                      |          |                  |           |
|-------------|----------|----------------------|----------|------------------|-----------|
| Source Type | ESI      | Ion Polarity         | Positive | Set Nebulizer    | 0.3 Bar   |
| Focus       | Active   | Set Capillary        | 4000 V   | Set Dry Heater   | 200 °C    |
| Scan Begin  | 100 m/z  | Set End Plate Offset | -500 V   | Set Dry Gas      | 3.0 l/min |
| Scan End    | 1000 m/z | Set Charging Voltage | 2000 V   | Set Divert Valve | Source    |
|             |          | Set Corona           | 0 nA     | Set APCI Heater  | 0 °C      |

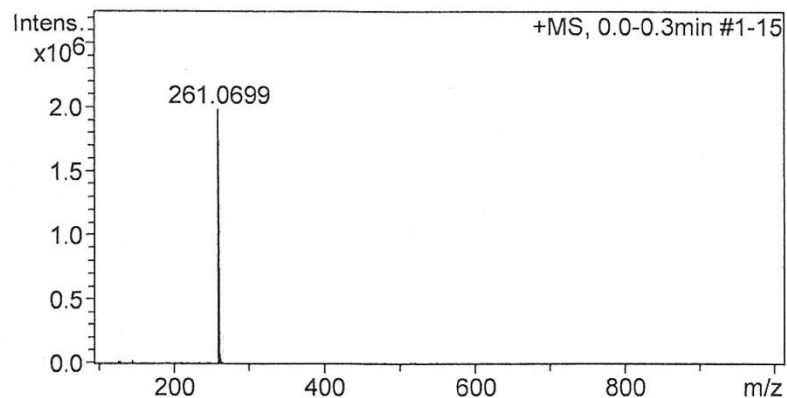

| # | m/z      | Res.  | S/N     | I       | I %   | FWHM   |
|---|----------|-------|---------|---------|-------|--------|
| 1 | 261.0699 | 32410 | 60509.1 | 1975905 | 100.0 | 0.0081 |

**Figure S6.** HR MS spectra of 8-*N*-methyl-*N*-(prop-2-ynyl)quinolinesulfonamide (**8b**)

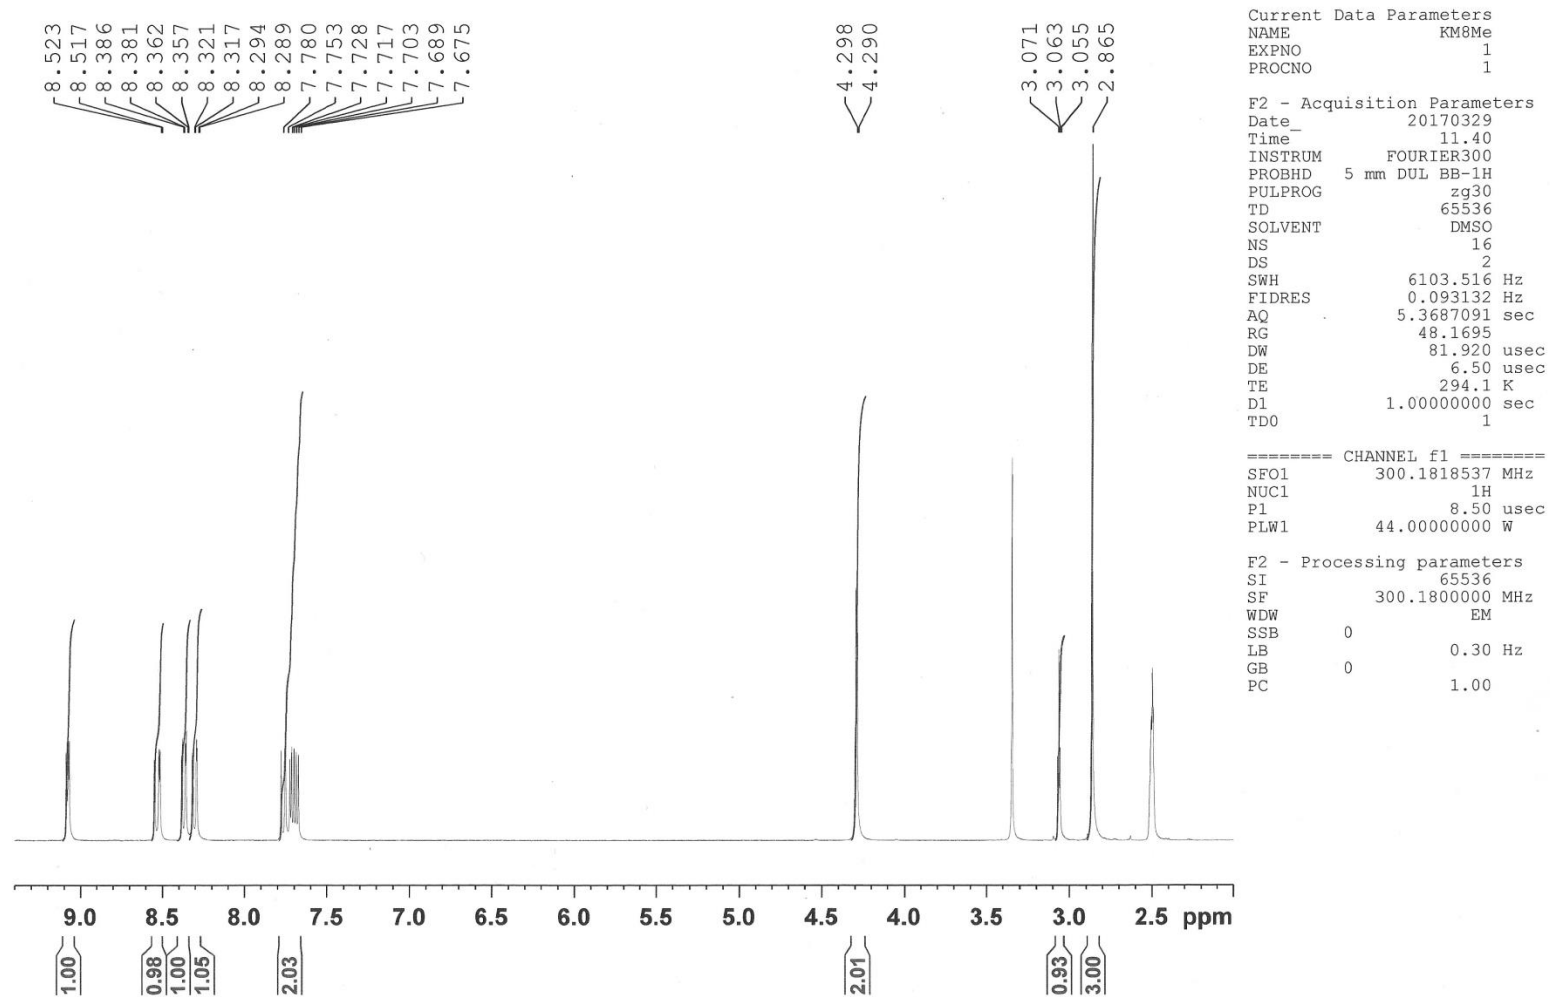

Figure S7.  $^1\text{H}$  NMR spectra of 8-*N*-methyl-*N*-(prop-2-ynyl)quinolinesulfonamide (**8b**)



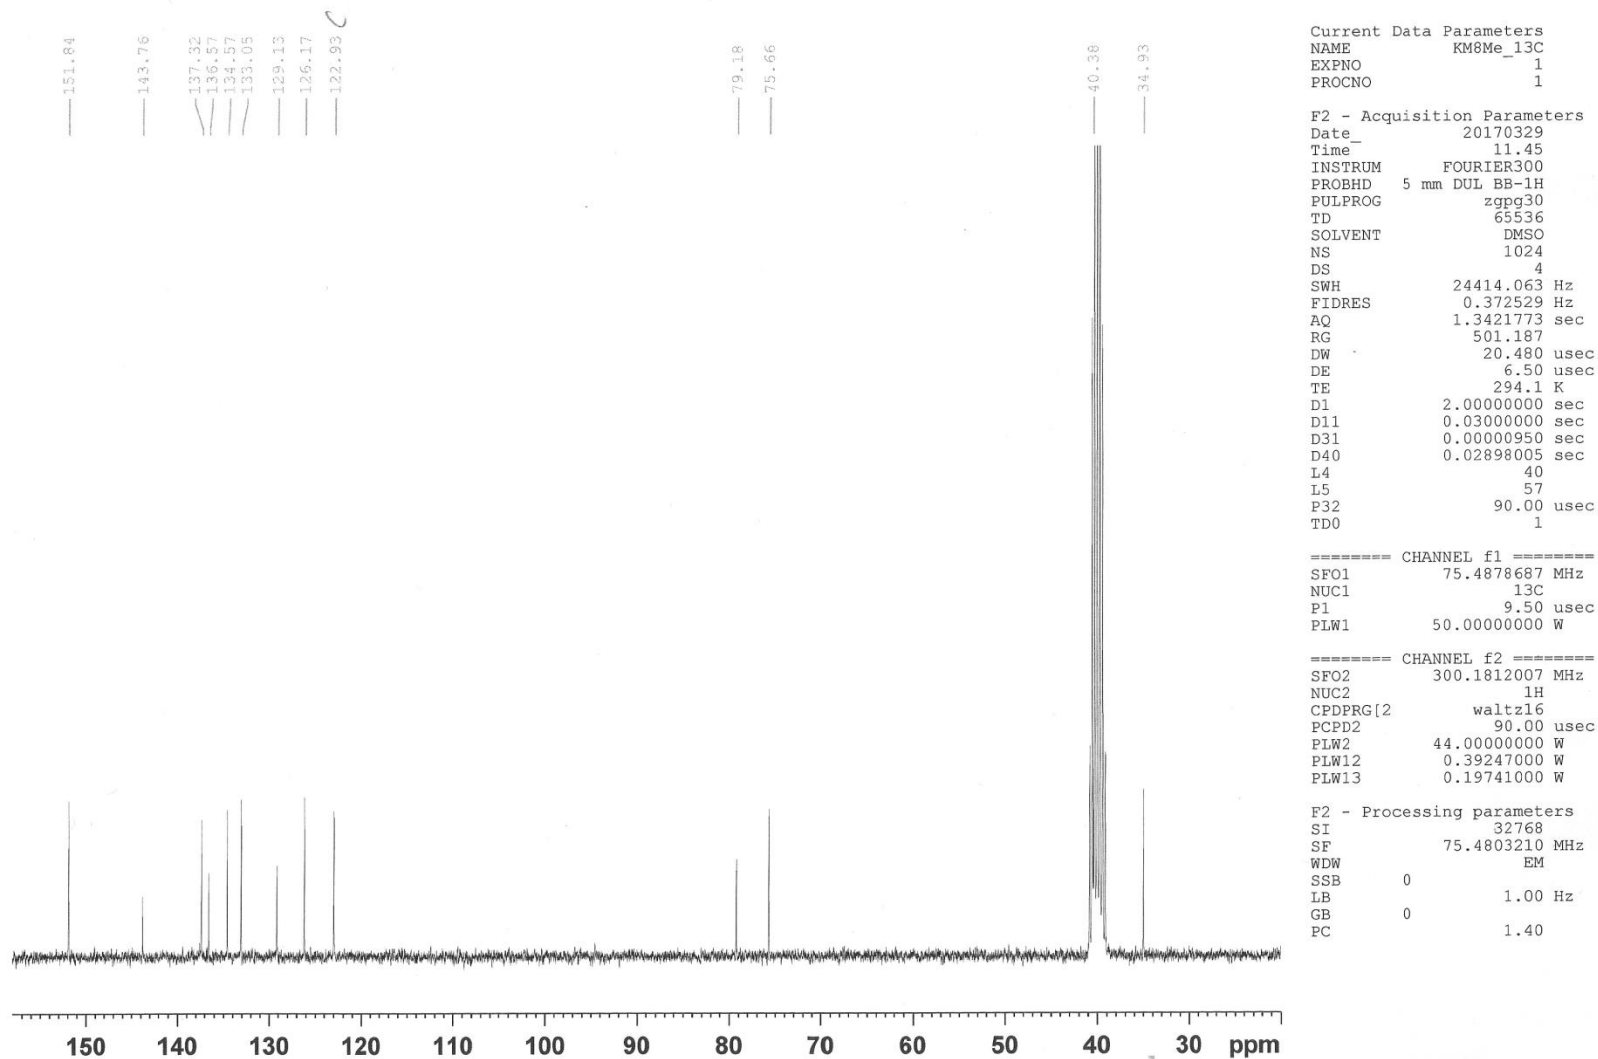

Figure S8.  $^{13}\text{C}$  NMR spectra of 8-*N*-methyl-*N*-(prop-2-ynyl)quinolinesulfonamide (**8b**)

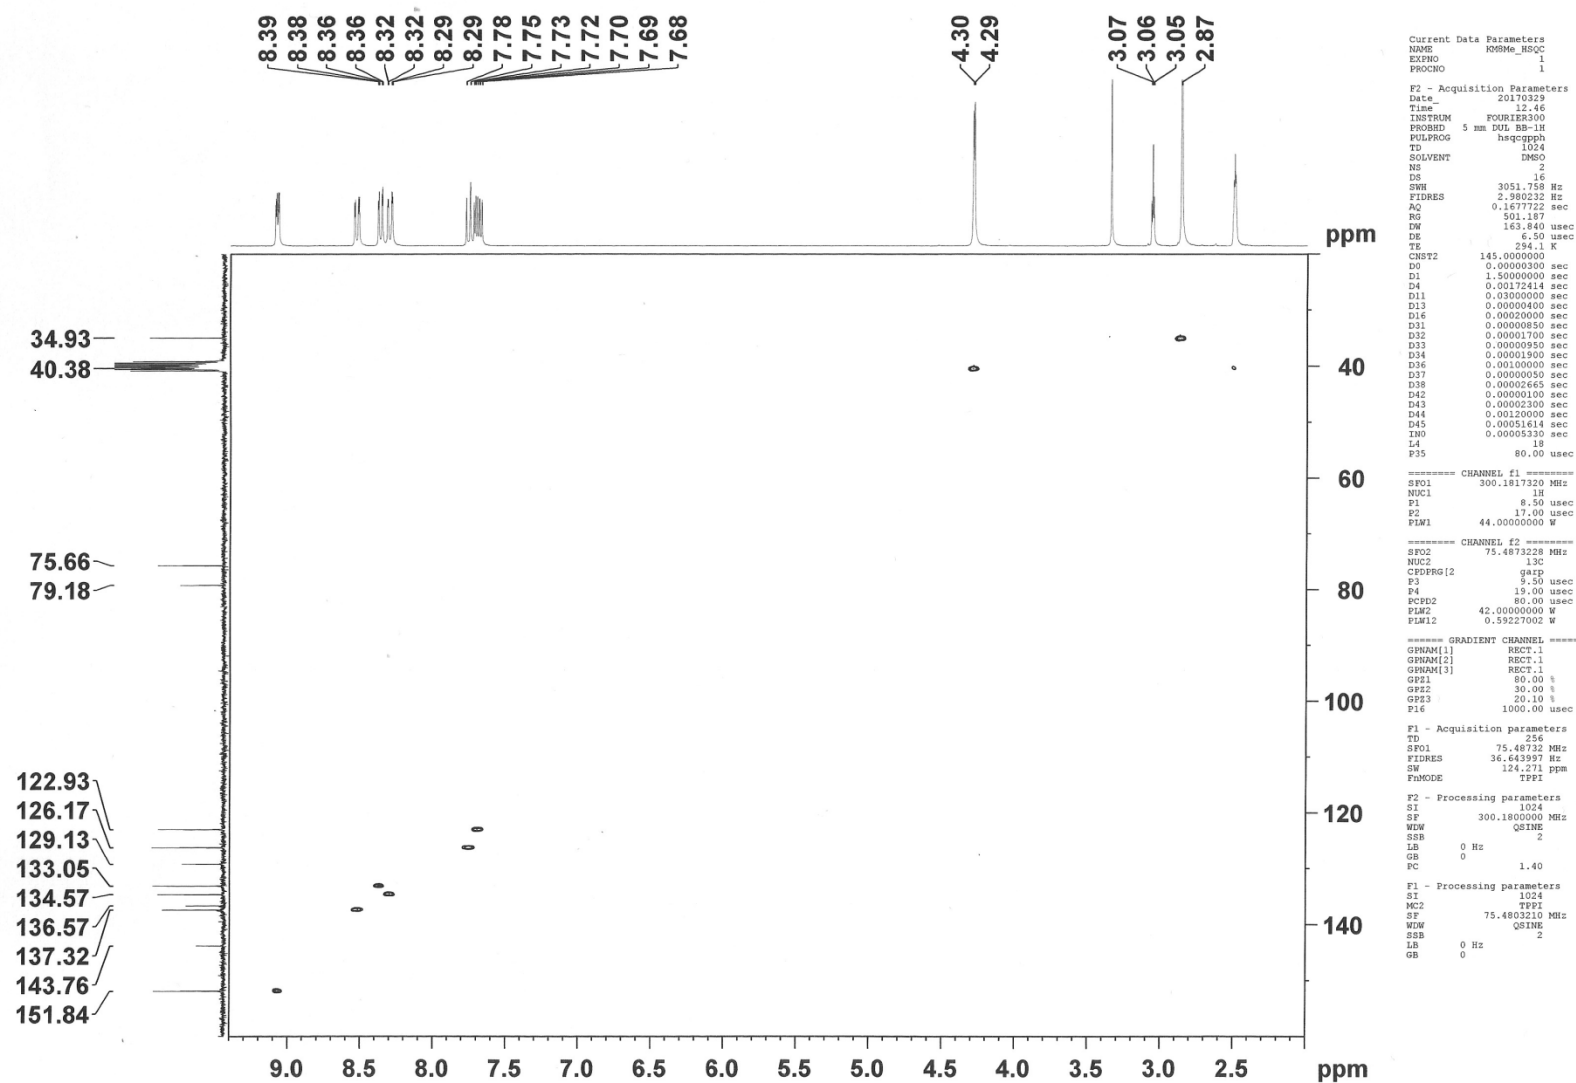

Figure S9. HSQC spectra of 8-N-methyl-N-(prop-2-ynyl)quinolinesulfonamide (8b)

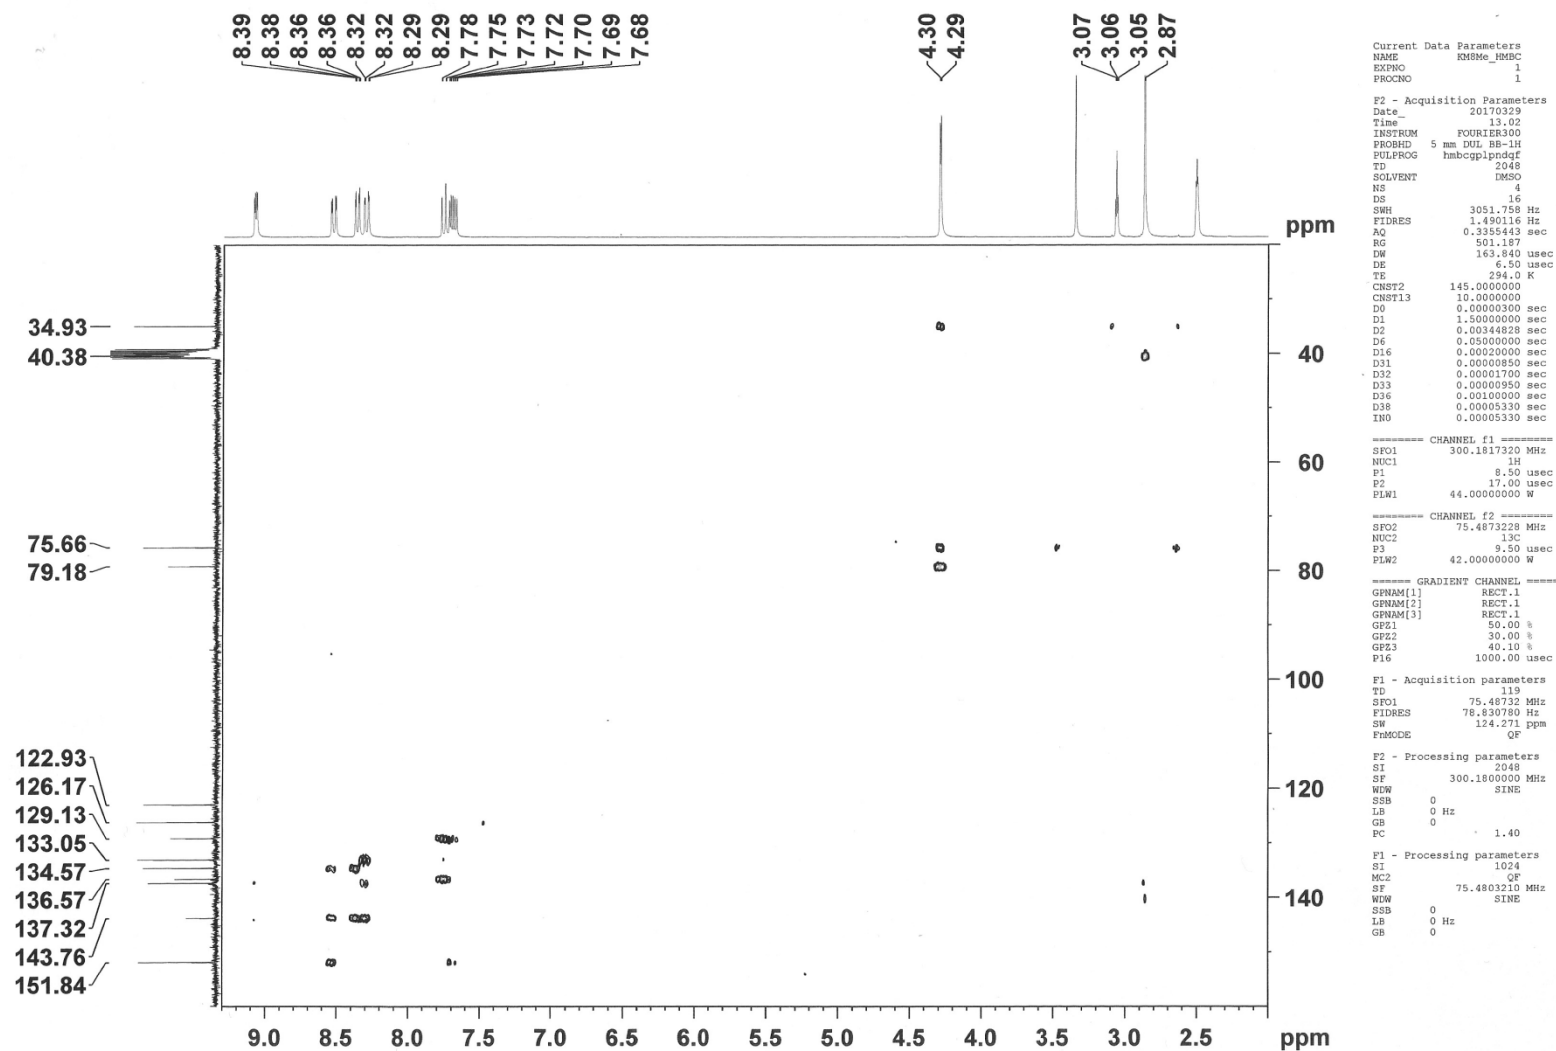

Figure S10. HMBC spectra of 8-*N*-methyl-*N*-(prop-2-ynyl)quinolinesulfonamide (**8b**)

## Compound Spectrum List Report

### Analysis Info

Analysis Name D:\Data\KM7QCI.d  
 Method low\_mass.m  
 Sample Name TM Low concentration  
 Comment

Operator KM  
 Instrument impact II 1825265.10082

### Acquisition Parameter

|             |          |                      |          |                  |           |
|-------------|----------|----------------------|----------|------------------|-----------|
| Source Type | ESI      | Ion Polarity         | Positive | Set Nebulizer    | 0.3 Bar   |
| Focus       | Active   | Set Capillary        | 4000 V   | Set Dry Heater   | 240 °C    |
| Scan Begin  | 100 m/z  | Set End Plate Offset | -500 V   | Set Dry Gas      | 4.0 l/min |
| Scan End    | 1000 m/z | Set Charging Voltage | 2000 V   | Set Divert Valve | Source    |
|             |          | Set Corona           | 0 nA     | Set APCI Heater  | 0 °C      |

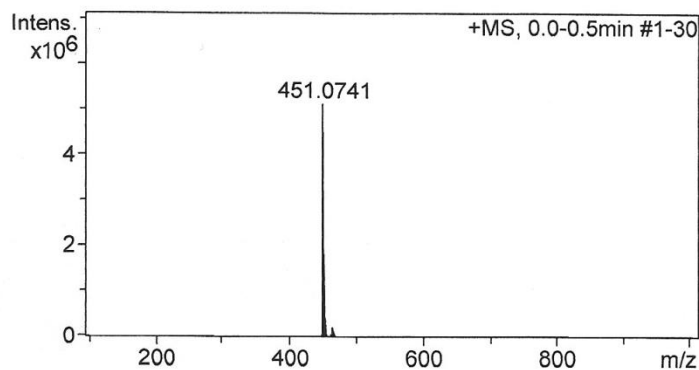

| # | m/z      | Res.  | S/N     | I       | I %   | FWHM   |
|---|----------|-------|---------|---------|-------|--------|
| 1 | 451.0741 | 46889 | 14570.0 | 5115211 | 100.0 | 0.0096 |
| 2 | 453.0711 | 42091 | 5173.1  | 1821962 | 35.6  | 0.0108 |
| 3 | 473.0557 | 37315 | 1641.0  | 630401  | 12.3  | 0.0127 |
| 4 | 475.0531 | 31446 | 613.5   | 237045  | 4.6   | 0.0151 |

**Figure S11.** HR MS spectra of 8-*N*-[1-(7-chloroquinolin-4-yl)-1*H*-1,2,3-triazol-4-yl]methyl]quinolinesulfonamide (**9a**)

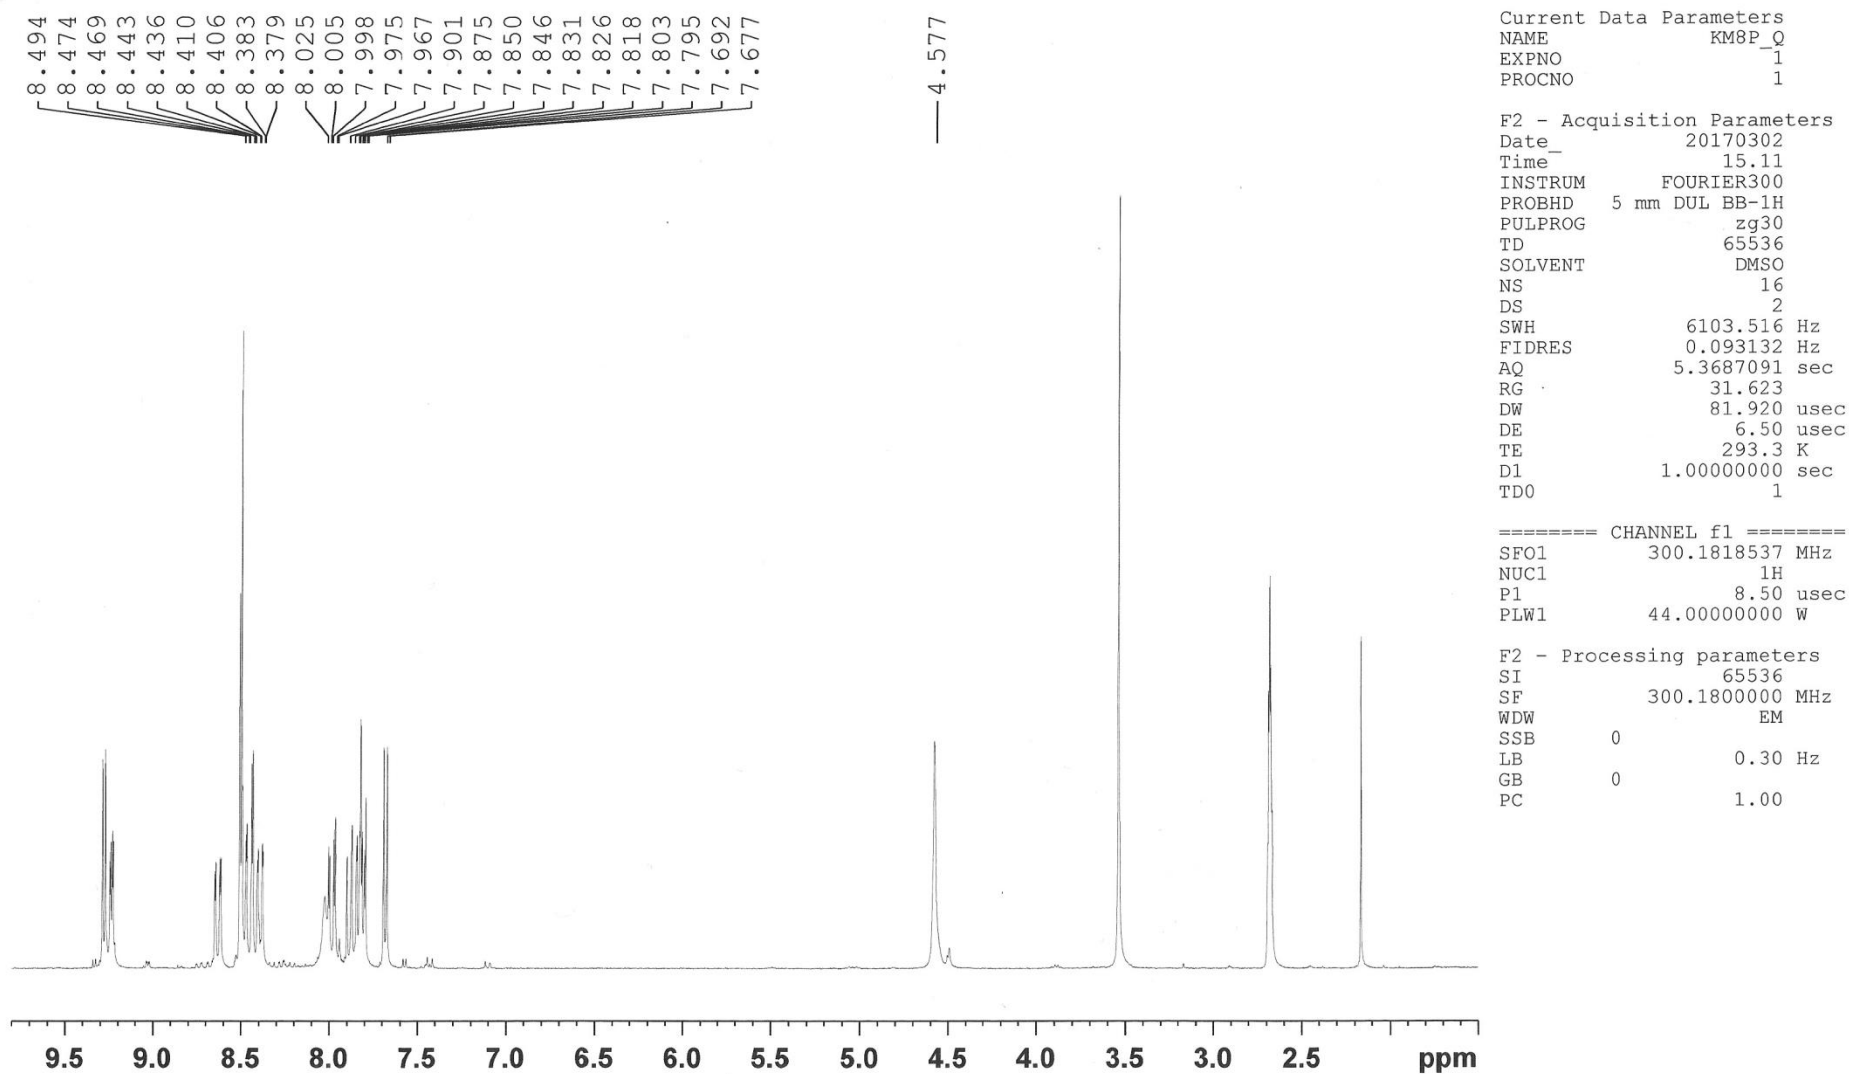

Figure S12. <sup>1</sup>H NMR spectra of 8-*N*-[[1-(7-chloroquinolin-4-yl)-1*H*-1,2,3-triazol-4-yl]methyl]quinolinesulfonamide (**9a**)

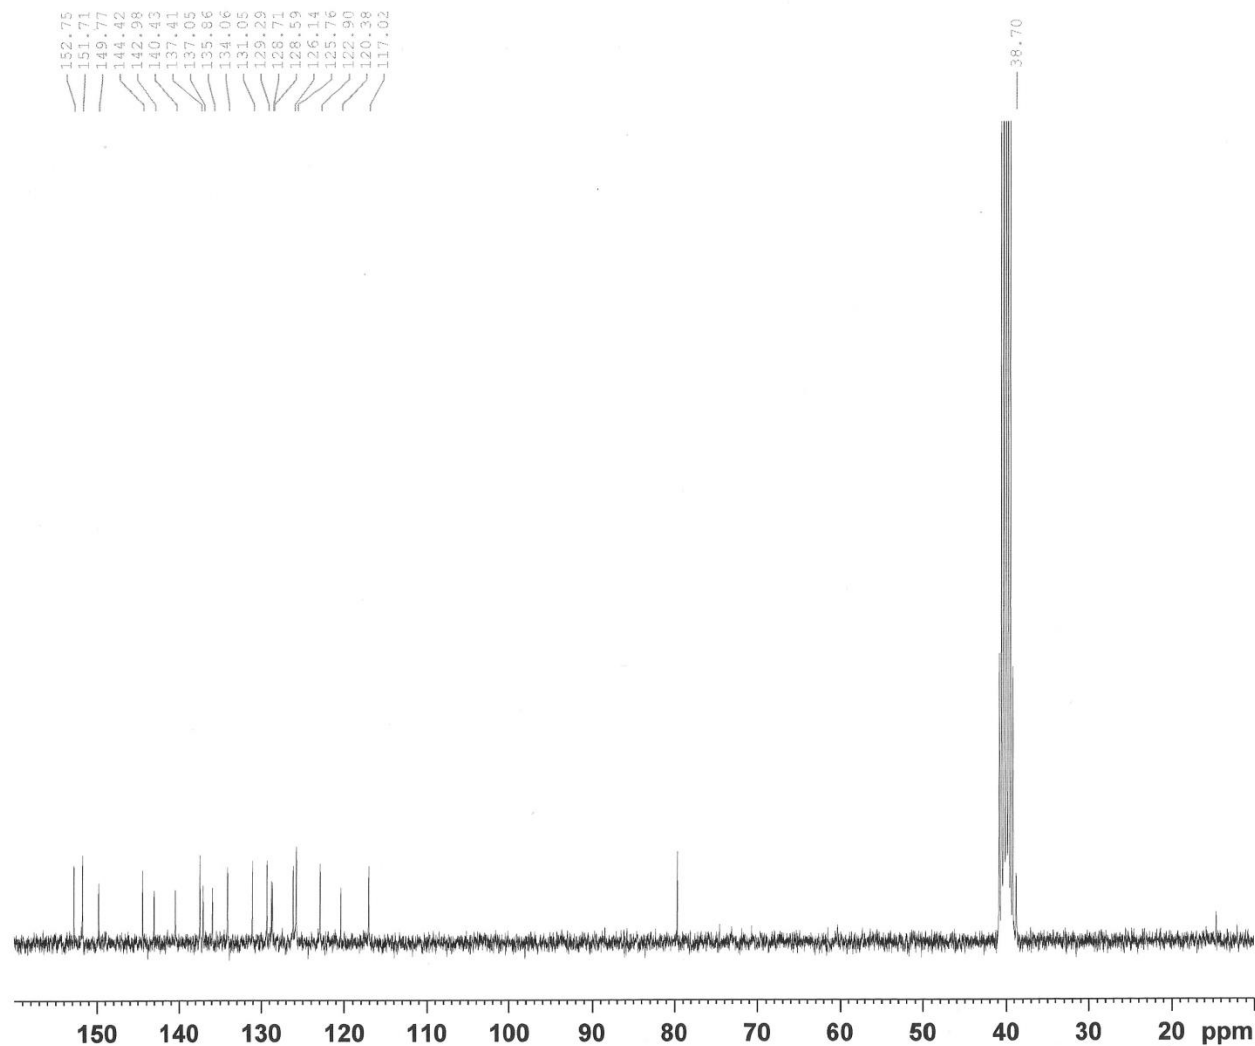

```

Current Data Parameters
NAME      KM8P_Q_13C
EXPNO     1
PROCNO    1

F2 - Acquisition Parameters
Date_     20170302
Time      16.00
INSTRUM   FOURIER300
PROBHD    5 mm DUL BB-1H
PULPROG   zgpg30
TD         65536
SOLVENT   DMSO
NS         1024
DS         4
SWH        24414.063 Hz
FIDRES     0.372529 Hz
AQ         1.3421773 sec
RG         501.187
DW         20.480 usec
DE         6.50 usec
TE         293.5 K
D1         2.00000000 sec
D11        0.03000000 sec
D31        0.00000950 sec
D40        0.02898005 sec
L4         40
L5         57
P32        90.00 usec
TD0        1

===== CHANNEL f1 =====
SFO1       75.4878687 MHz
NUC1       13C
P1         9.50 usec
PLW1       50.00000000 W

===== CHANNEL f2 =====
SFO2       300.1812007 MHz
NUC2       1H
CPDPRG[2] waltz16
PCPD2      90.00 usec
PLW2       44.00000000 W
PLW12      0.39247000 W
PLW13      0.19741000 W

F2 - Processing parameters
SI         32768
SF         75.4803210 MHz
WDW        EM
SSB        0
LB         1.00 Hz
GB         0
PC         1.40

```

**Figure S13.**  $^{13}\text{C}$  NMR spectra of 8-N-[[1-(7-chloroquinolin-4-yl)-1H-1,2,3-triazol-4-yl]methyl]quinolinesulfonamide (**9a**)

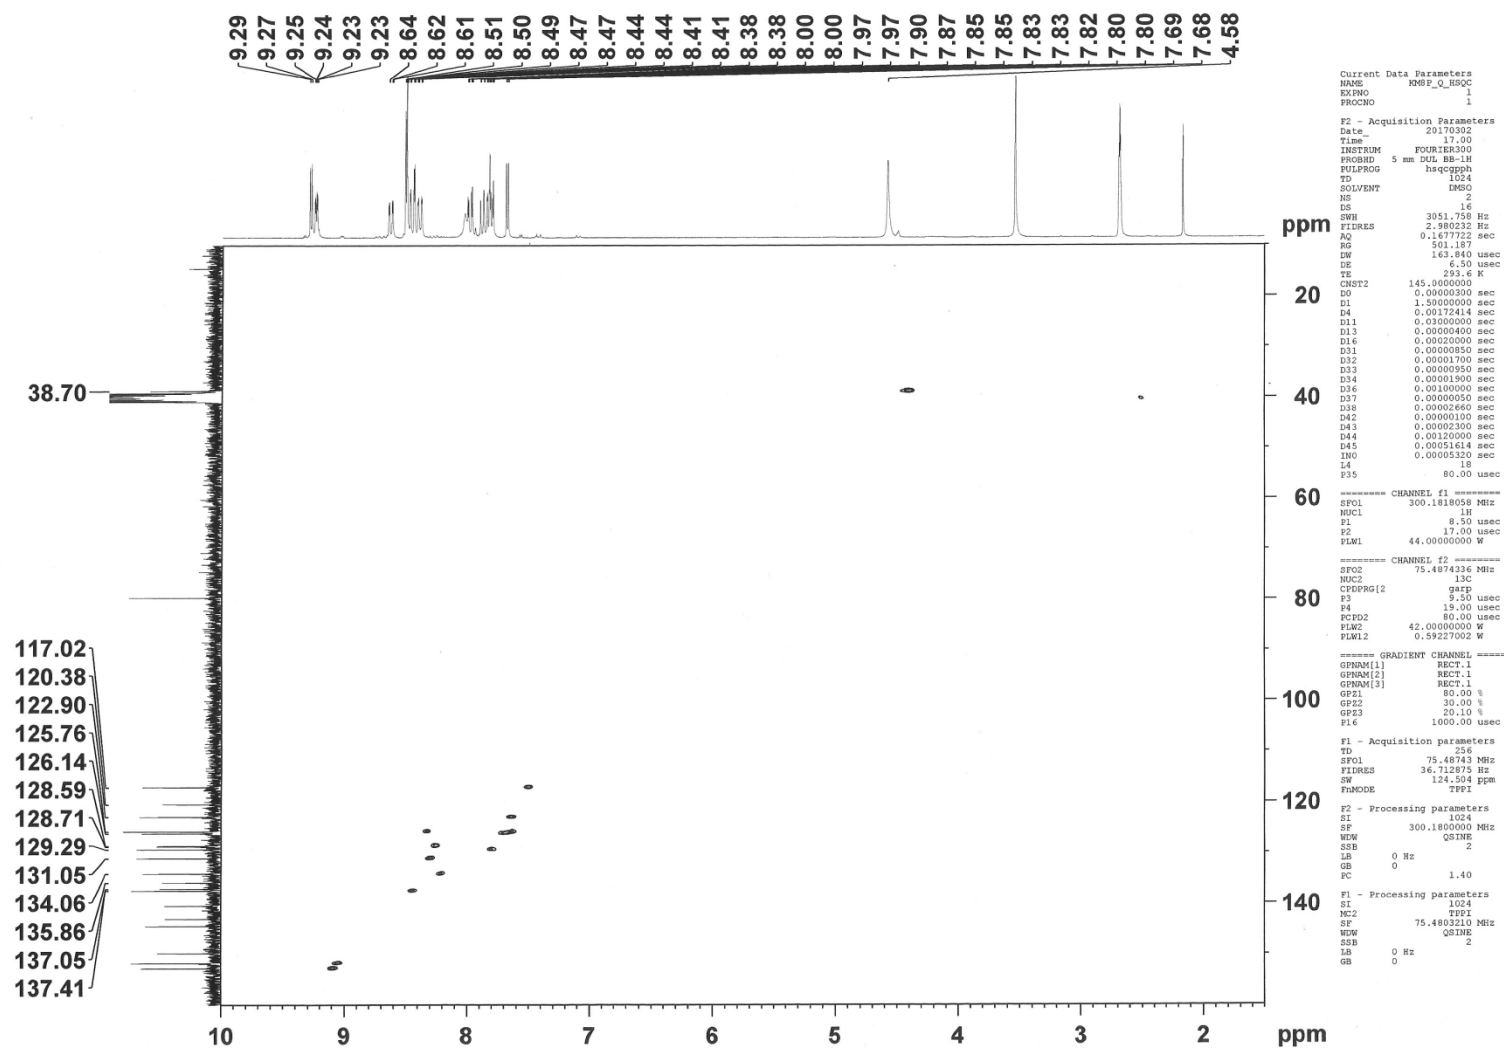

**Figure S14.** HSQC spectra of 8-*N*-[1-(7-chloroquinolin-4-yl)-1*H*-1,2,3-triazol-4-yl]methyl]quinolinesulfonamide (**9a**)

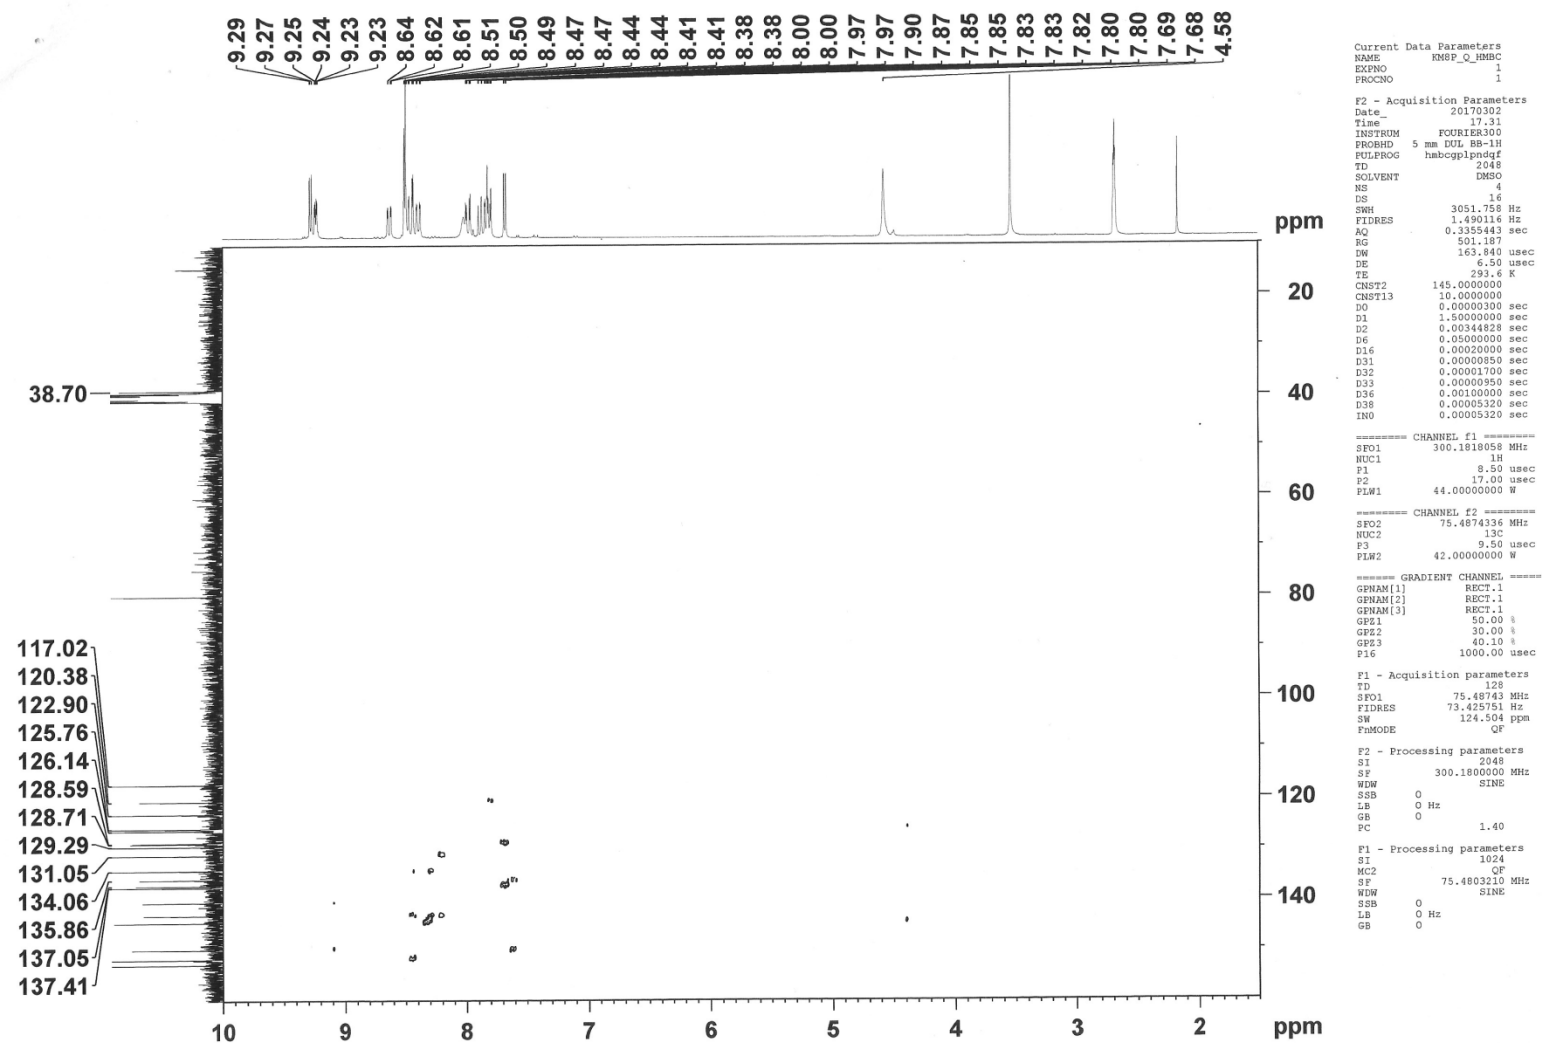

Figure S15. HMBC spectra of 8-*N*-[1-(7-chloroquinolin-4-yl)-1*H*-1,2,3-triazol-4-yl]methyl]quinolinesulfonamide (**9a**)



## Compound Spectrum List Report

### Analysis Info

|               |                      |            |           |               |
|---------------|----------------------|------------|-----------|---------------|
| Analysis Name | D:\Data\KMFosf.d     | Operator   | KM        |               |
| Method        | low_mass.m           | Instrument | impact II | 1825265.10082 |
| Sample Name   | TM Low concentration |            |           |               |
| Comment       |                      |            |           |               |

### Acquisition Parameter

|             |          |                      |          |                  |           |
|-------------|----------|----------------------|----------|------------------|-----------|
| Source Type | ESI      | Ion Polarity         | Positive | Set Nebulizer    | 0.3 Bar   |
| Focus       | Active   | Set Capillary        | 4000 V   | Set Dry Heater   | 240 °C    |
| Scan Begin  | 100 m/z  | Set End Plate Offset | -500 V   | Set Dry Gas      | 4.0 l/min |
| Scan End    | 1000 m/z | Set Charging Voltage | 2000 V   | Set Divert Valve | Source    |
|             |          | Set Corona           | 0 nA     | Set APCI Heater  | 0 °C      |

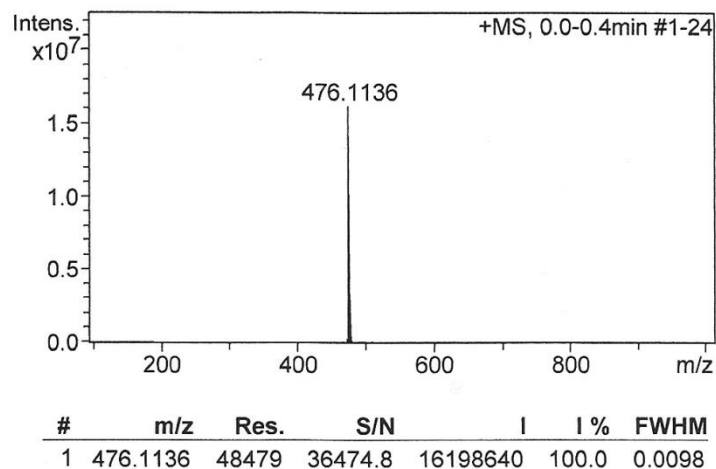

**Figure S16.** HR MS spectra of diethyl 2-[4-[methyl-(8-sulfamoylquinolyl)-1H-1,2,3-triazol-1-yl]]ethylphosphonate (**9b**)

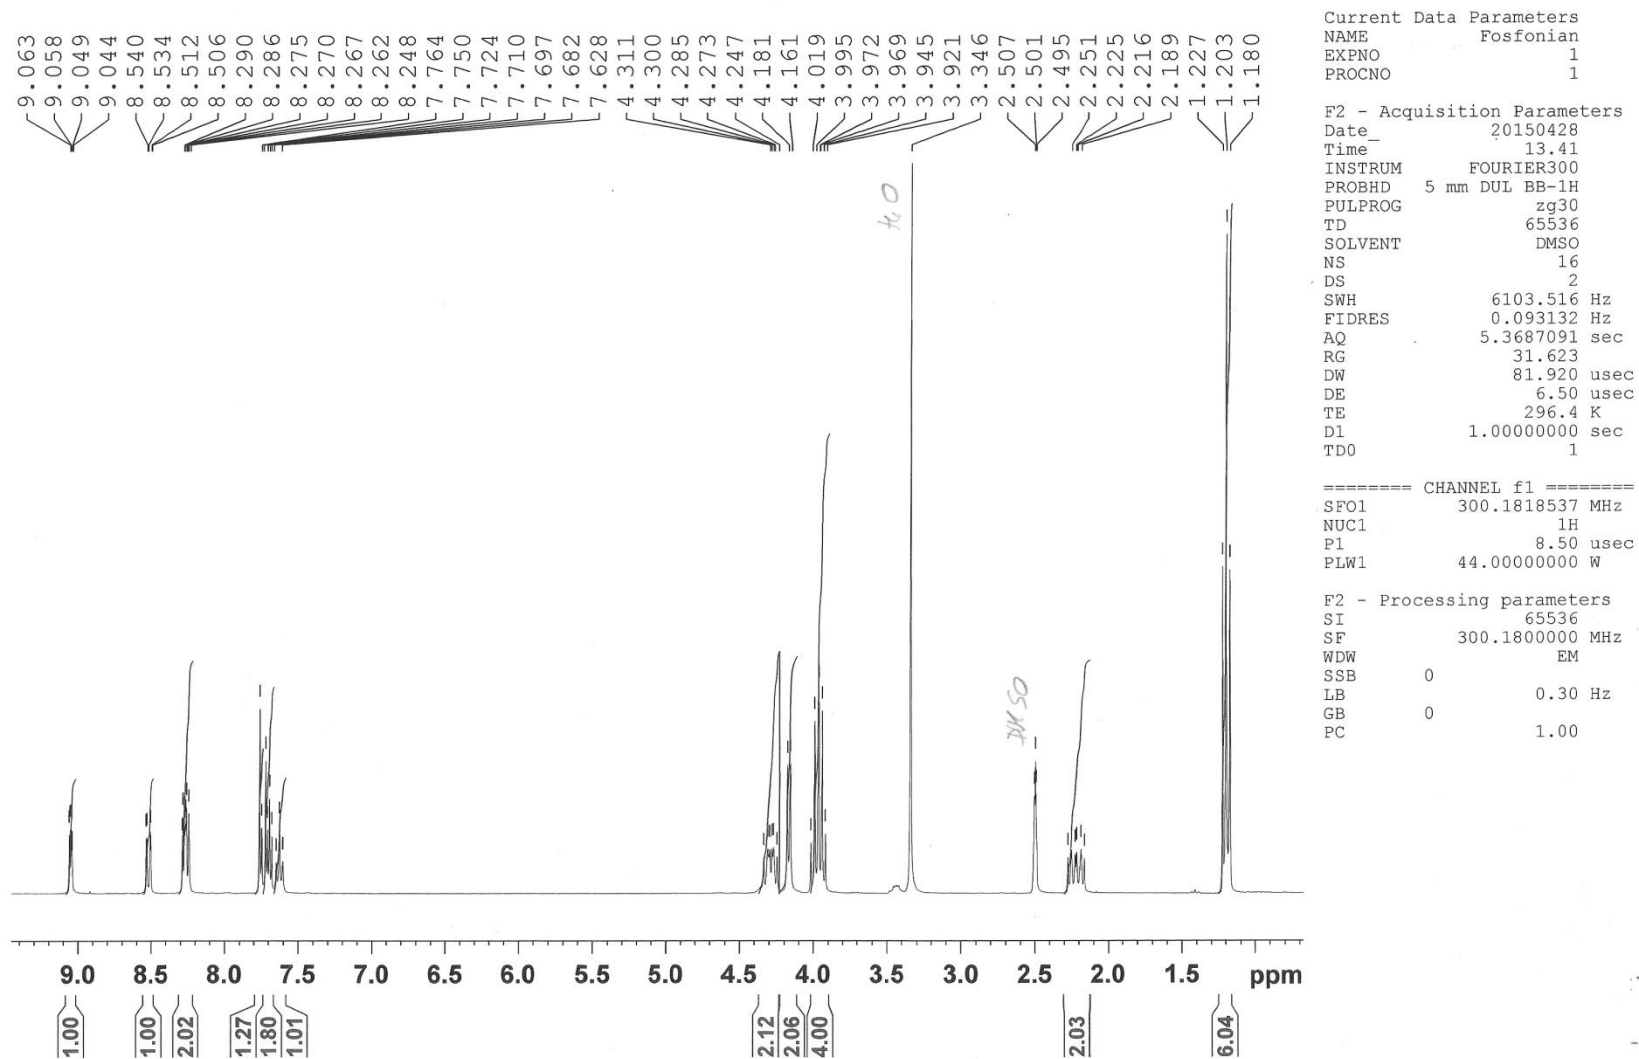

**Figure S17.**  $^1\text{H}$  NMR spectra of diethyl 2-[4-[methyl-(8-sulfamoylquinolyl)-1H-1,2,3-triazol-1-yl]]ethylphosphonate (**9b**)

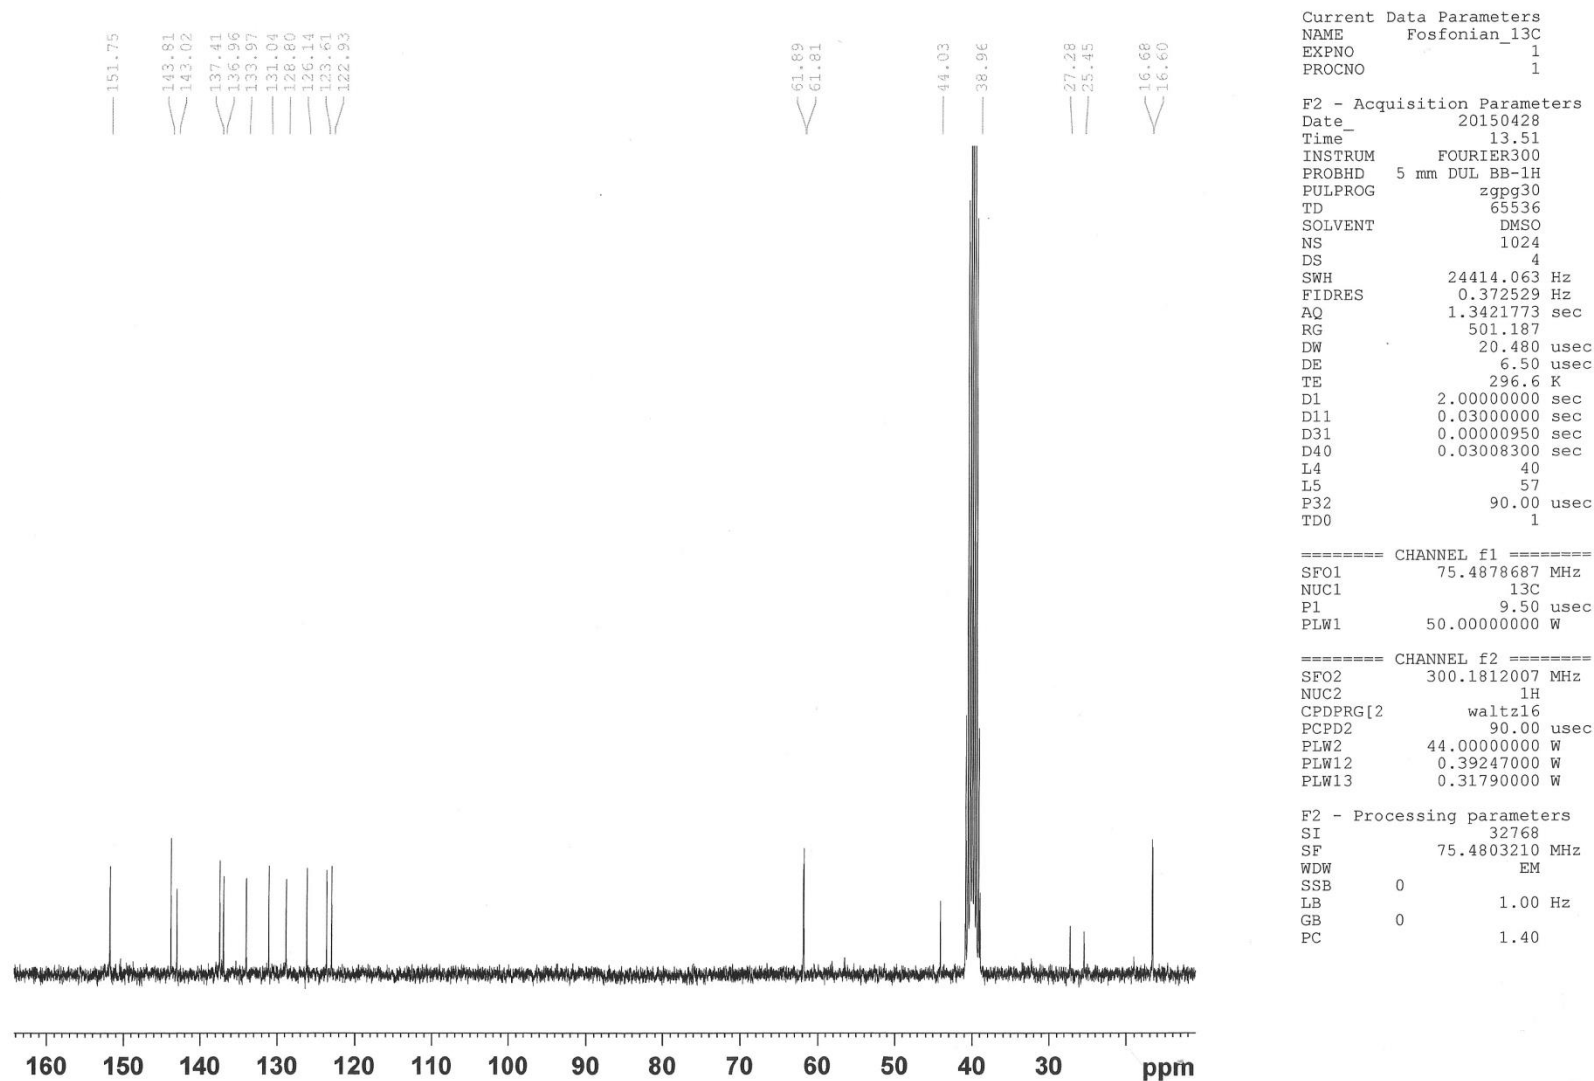

Figure S18.  $^{13}\text{C}$  NMR spectra of diethyl 2-{4-[methyl-(8-sulfamoylquinolyl)-1H-1,2,3-triazol-1-yl]}ethylphosphonate (**9b**)

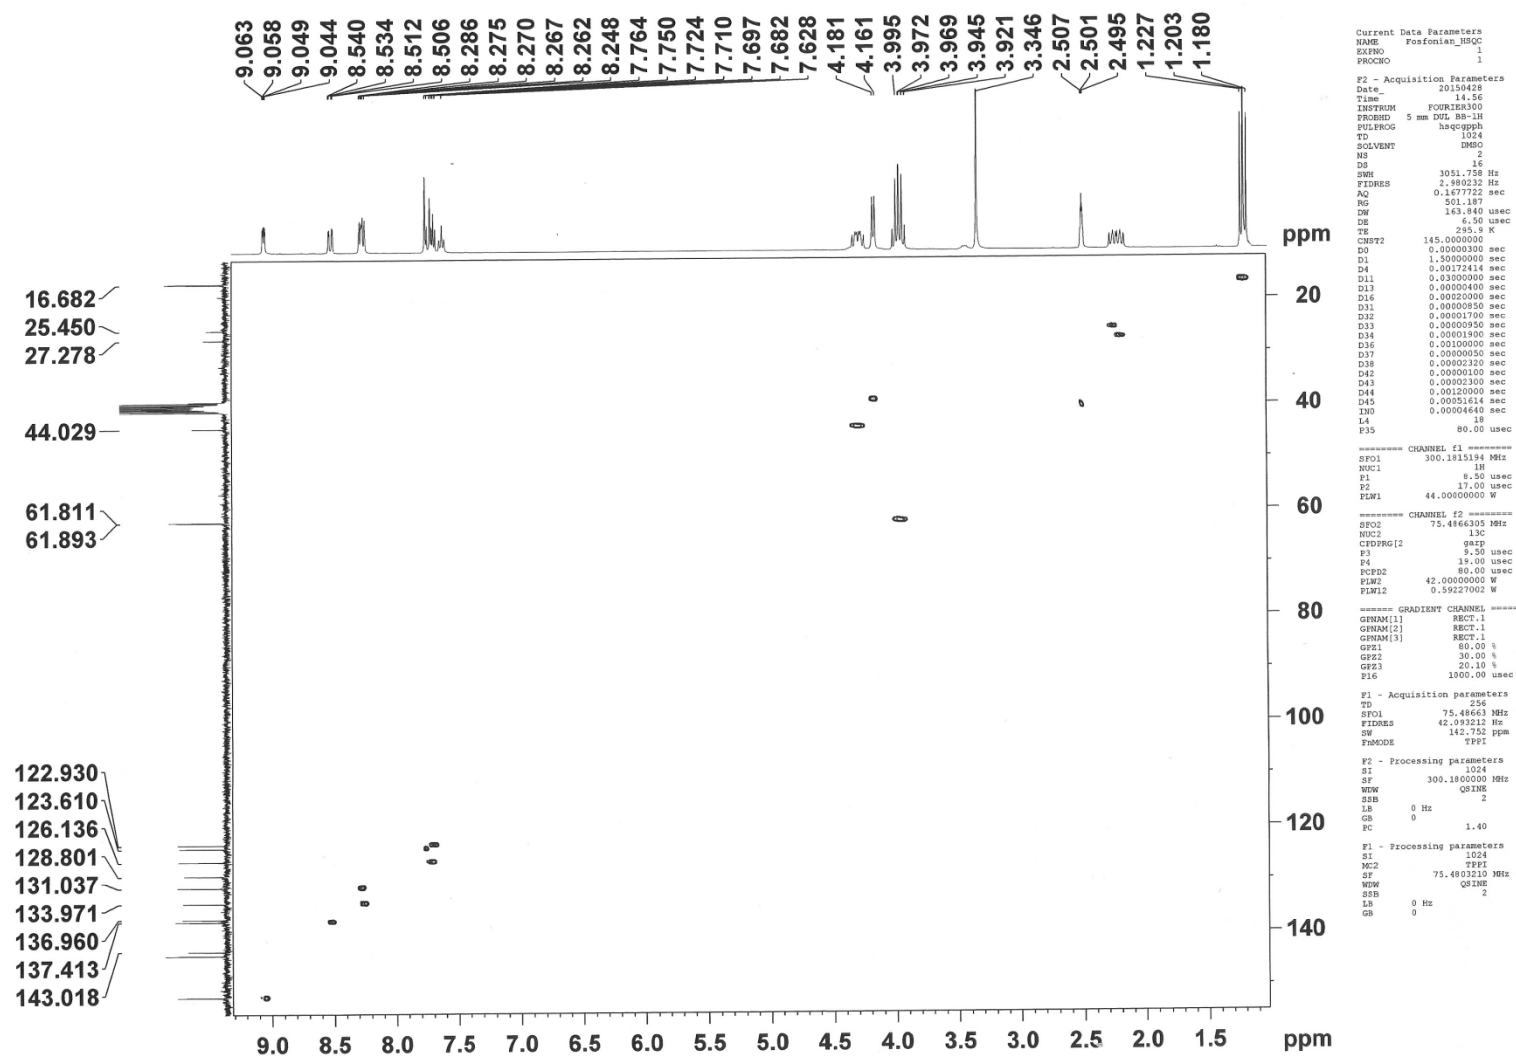

Figure S19. HSQC spectra diethyl 2-{4-[methyl-(8-sulfamoylquinolyl)-1H-1,2,3-triazol-1-yl]}ethylphosphonate (**9b**)

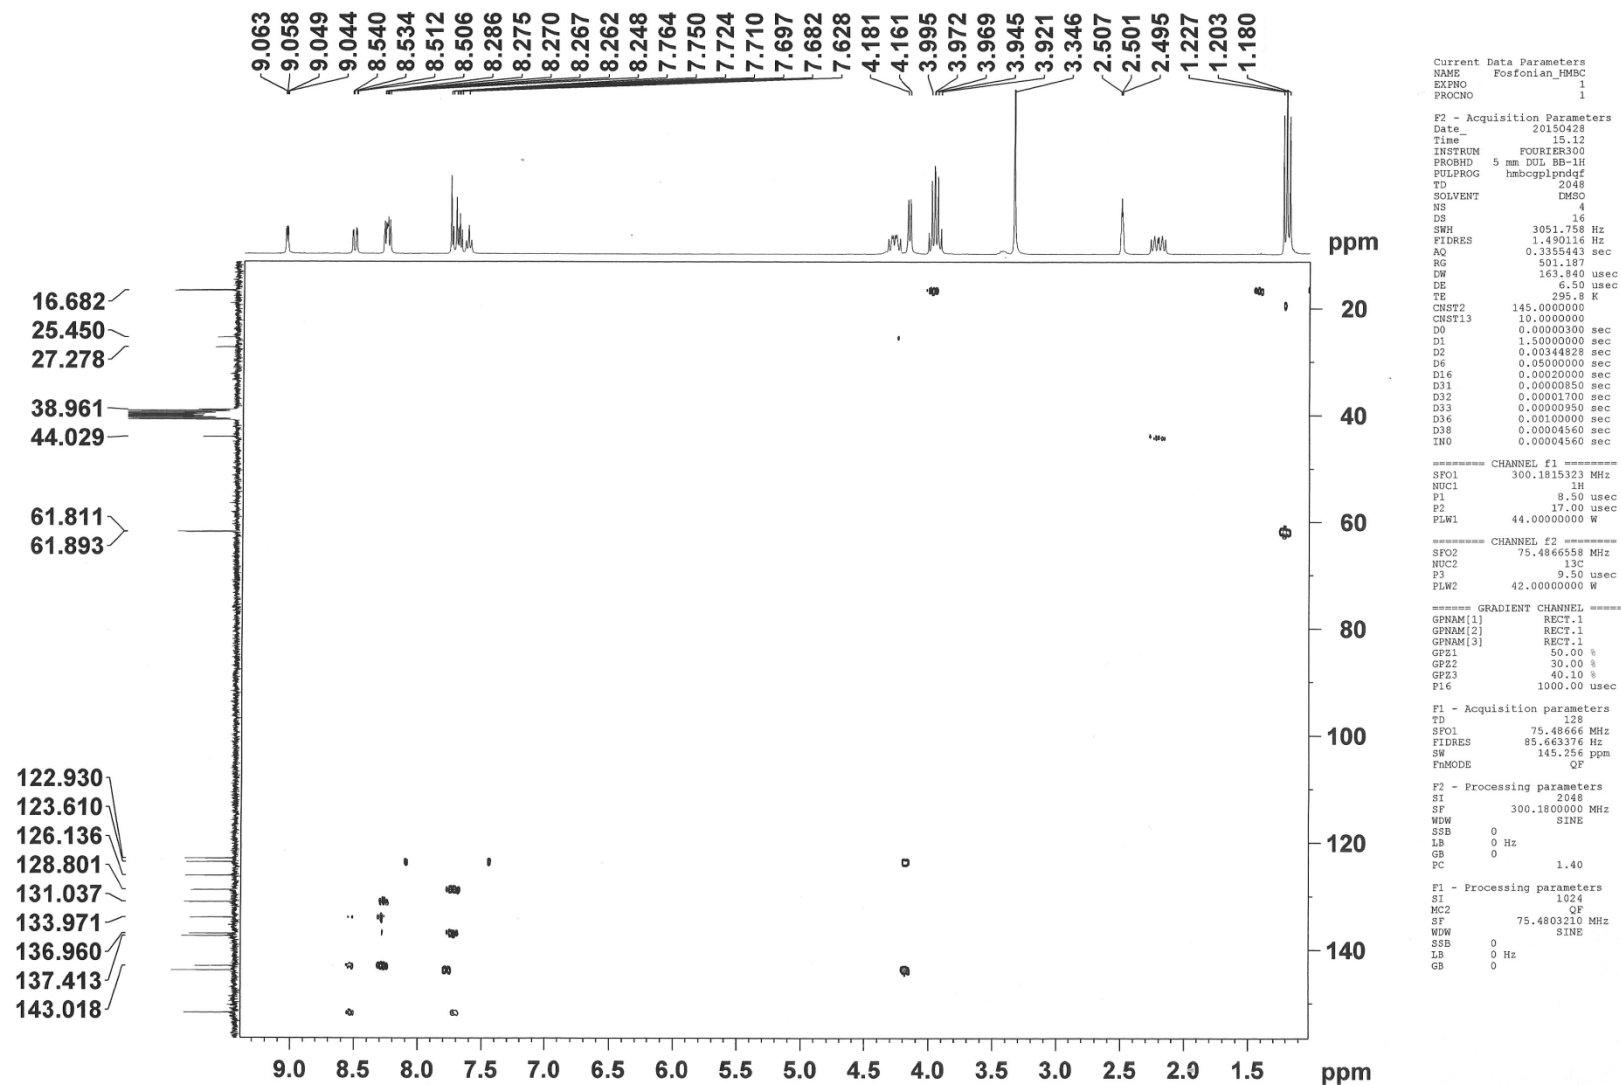

Figure S20. HMBC spectra diethyl 2-[4-[methyl-(8-sulfamoylquinolyl)-1H-1,2,3-triazol-1-yl]]ethylphosphonate (**9b**)

## Compound Spectrum List Report

### Analysis Info

Analysis Name D:\Data\KMEster.d  
Method low\_mass.m  
Sample Name TM Low concentration  
Comment

Operator KM  
Instrument impact II 1825265.10082

### Acquisition Parameter

|             |          |                      |          |                  |           |
|-------------|----------|----------------------|----------|------------------|-----------|
| Source Type | ESI      | Ion Polarity         | Positive | Set Nebulizer    | 0.3 Bar   |
| Focus       | Active   | Set Capillary        | 4000 V   | Set Dry Heater   | 240 °C    |
| Scan Begin  | 100 m/z  | Set End Plate Offset | -500 V   | Set Dry Gas      | 4.0 l/min |
| Scan End    | 1000 m/z | Set Charging Voltage | 2000 V   | Set Divert Valve | Source    |
|             |          | Set Corona           | 0 nA     | Set APCI Heater  | 0 °C      |

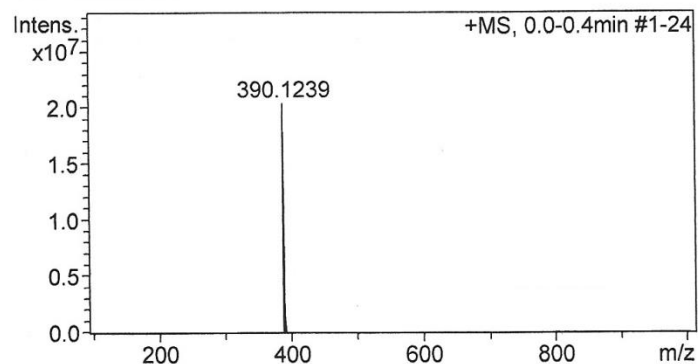

| # | m/z      | Res.  | S/N     | I        | I %   | FWHM   |
|---|----------|-------|---------|----------|-------|--------|
| 1 | 390.1239 | 22292 | 75359.1 | 20377458 | 100.0 | 0.0175 |

**Figure S21** . HR MS spectra of ethyl 3-[[4-(8-sulfamoylquinolyl)methyl]-1*H*-1,2,3-triazol-1-yl]propanoate (**9c**)

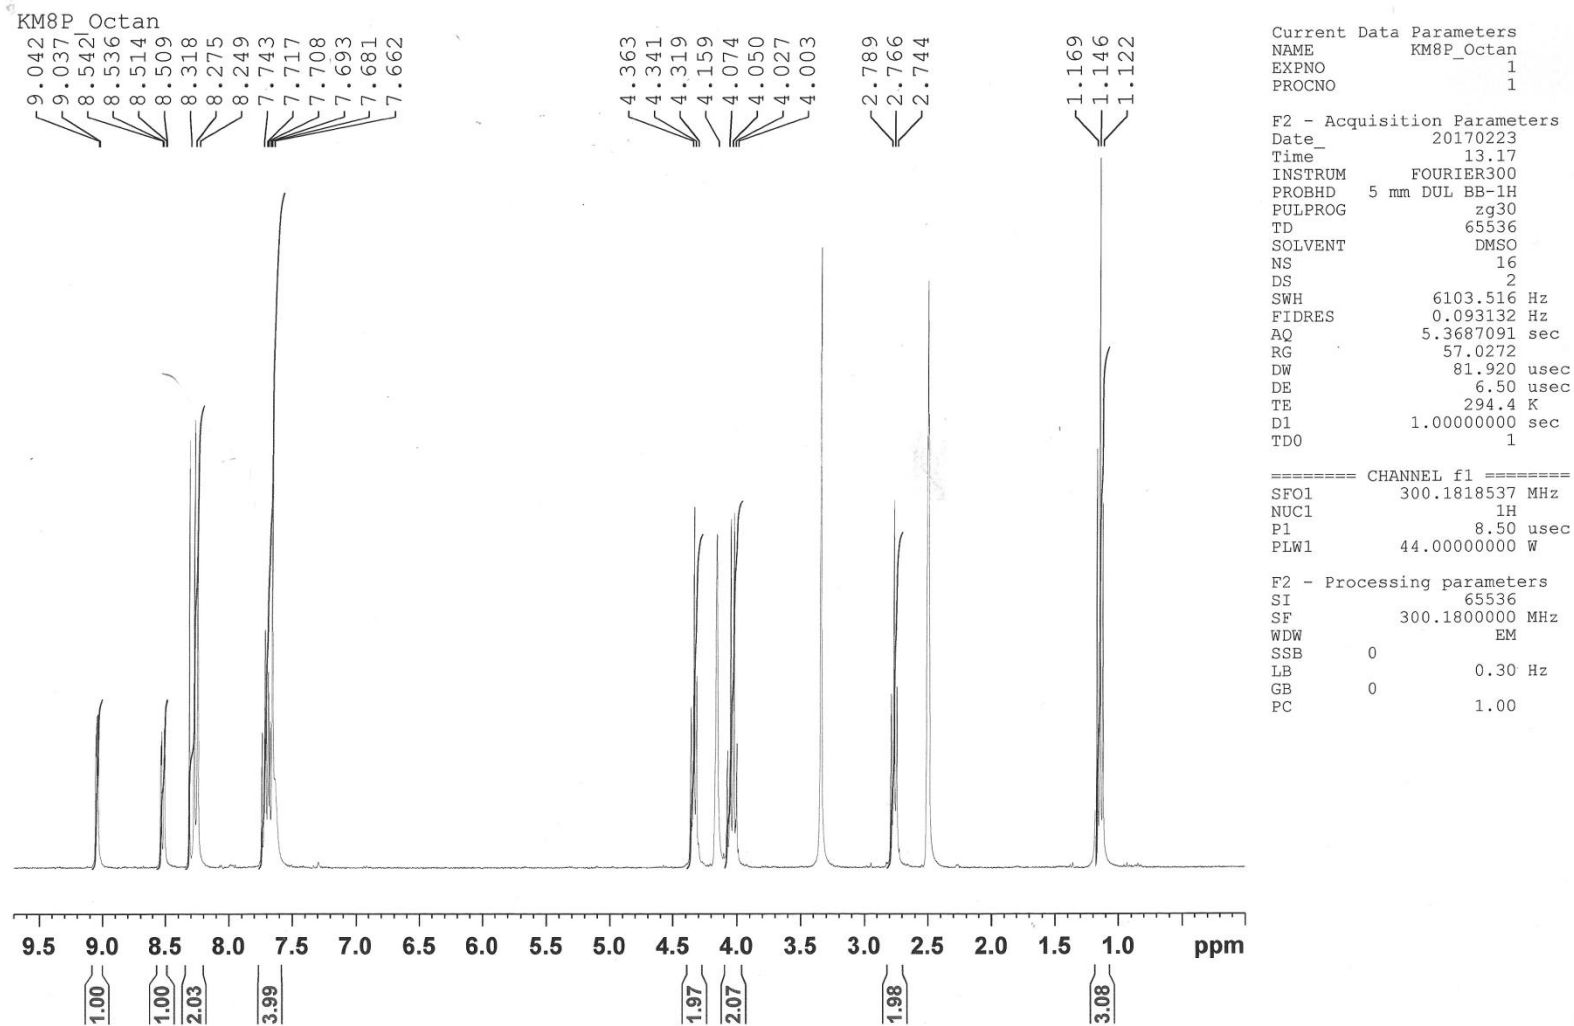

Figure S22.  $^1\text{H}$  NMR spectra of ethyl 3-[[4-(8-sulfamoylquinolyl)methyl]-1H-1,2,3-triazol-1-yl]propanoate (9c)

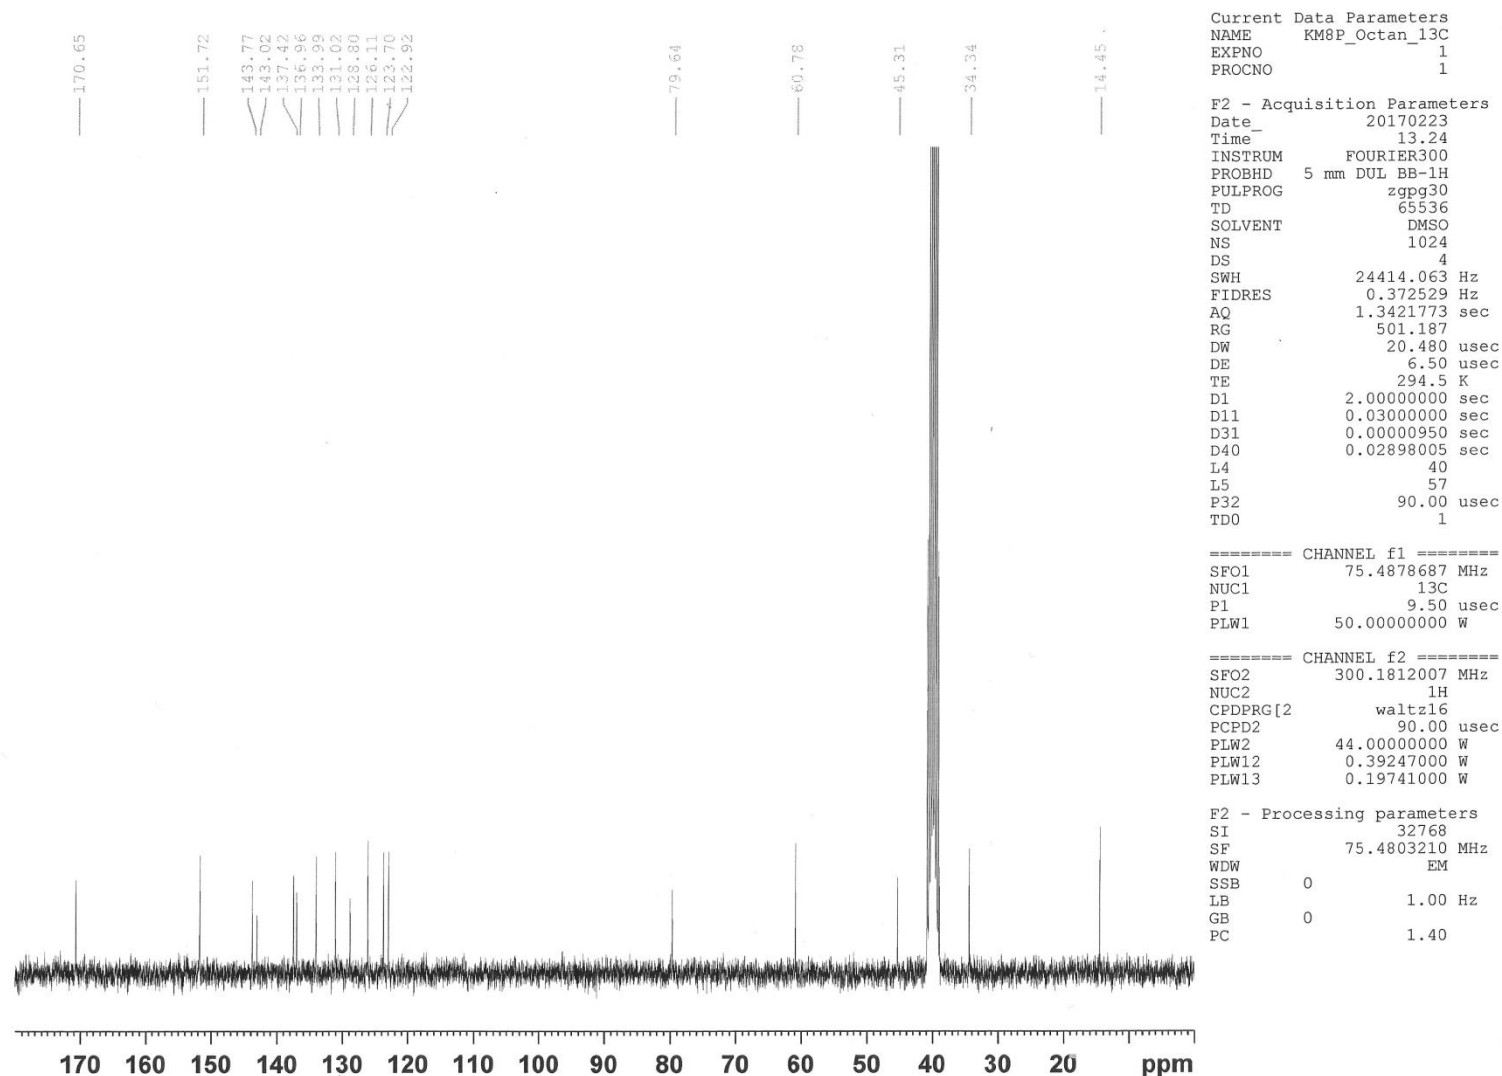

Figure S23 .  $^{13}\text{C}$  NMR spectra of ethyl 3-[[4-(8-sulfamoylquinolyl)methyl]-1H-1,2,3-triazol-1-yl]propanoate (**9c**)



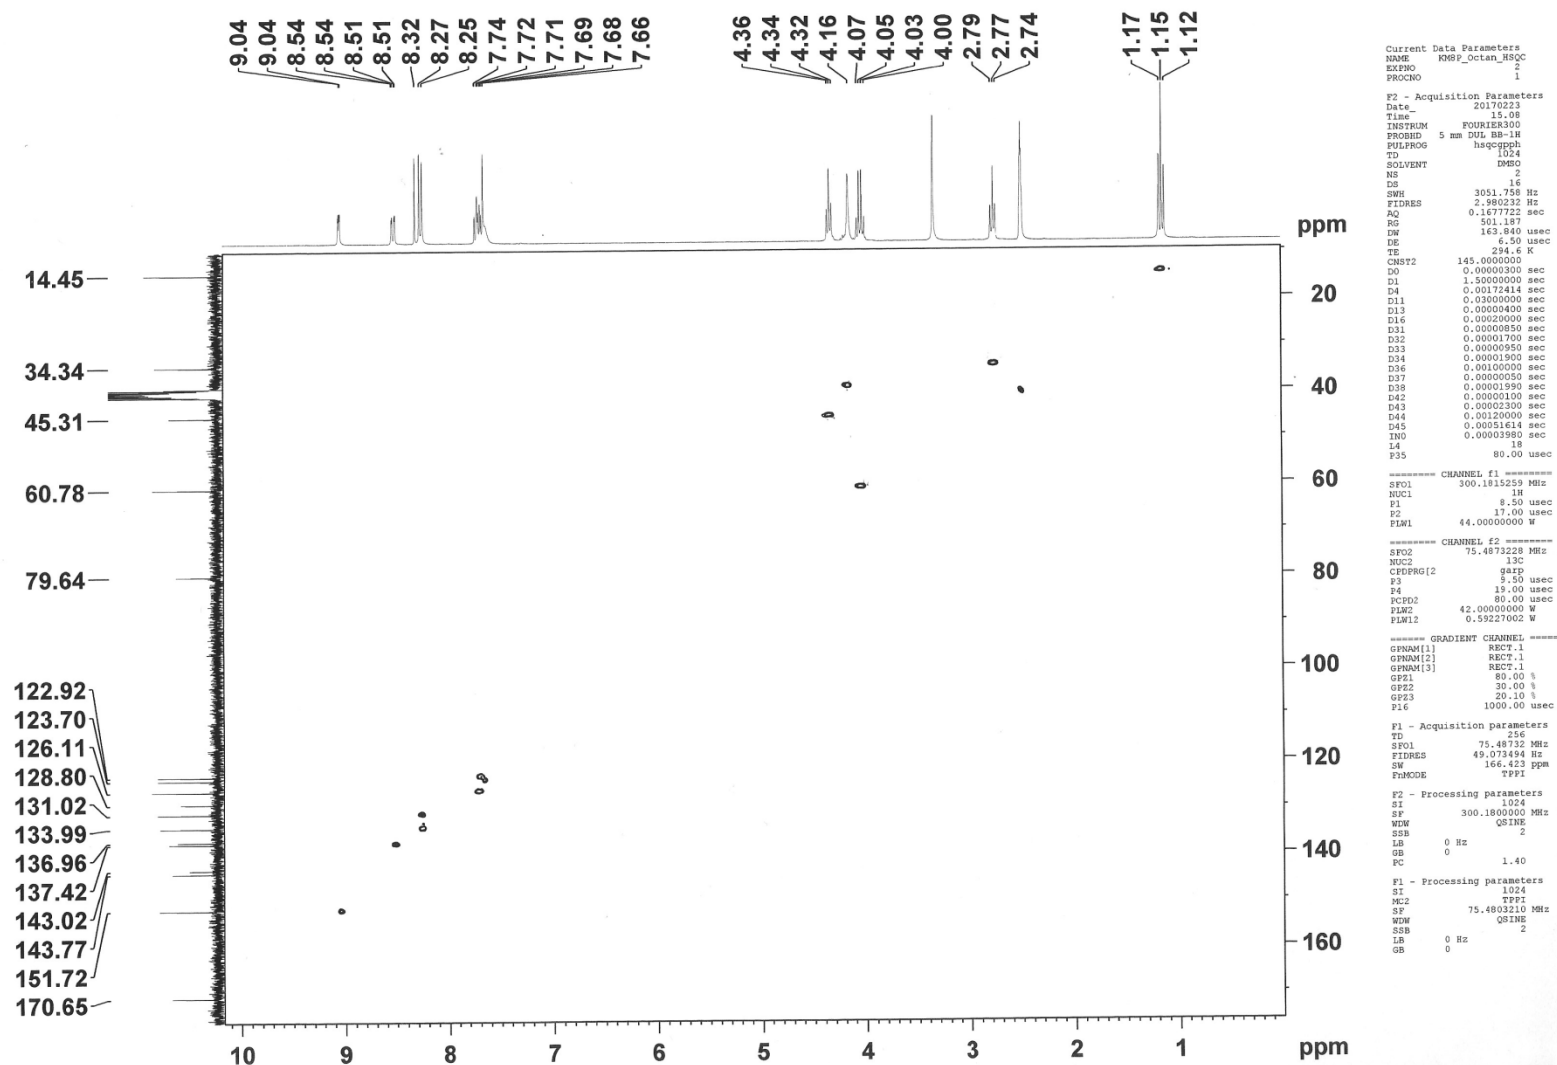

Figure S24. <sup>1</sup>HSCC spectra of ethyl 3-[[4-(8-sulfamoylquinolyl)methyl]-1H-1,2,3-triazol-1-yl]propanoate (9c)

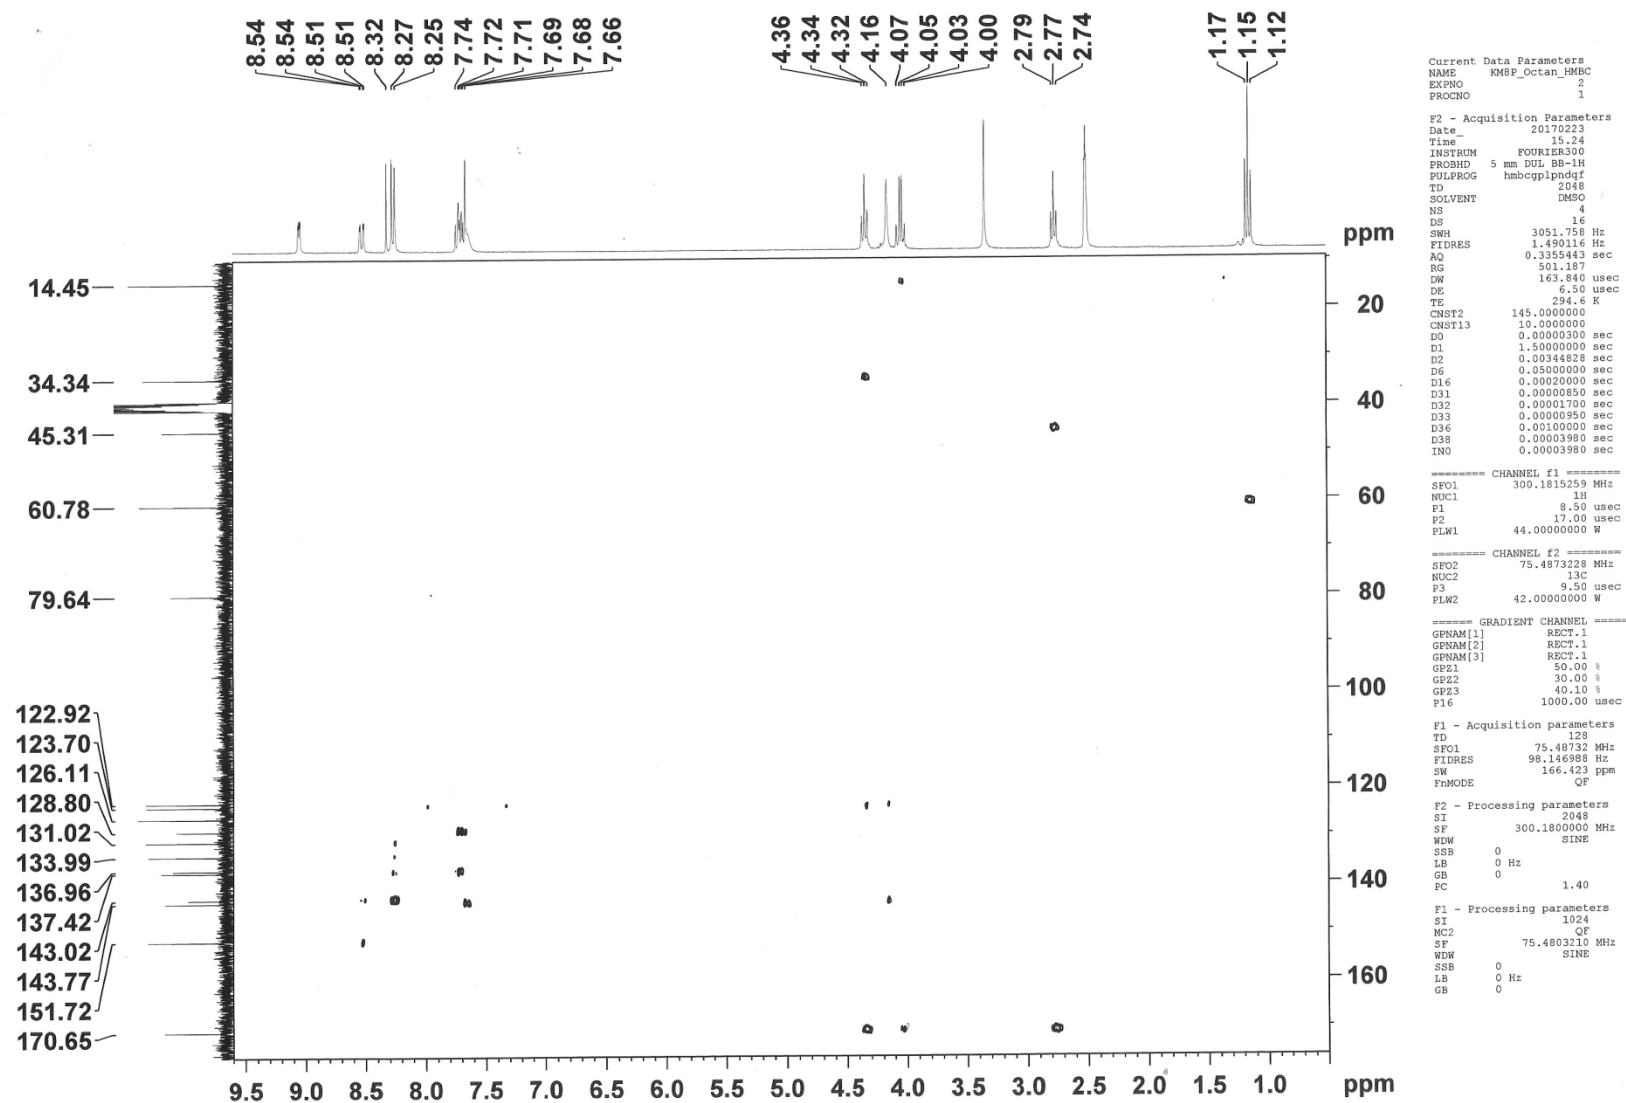

Figure S25. <sup>1</sup>HMBC spectra of ethyl 3-[[4-(8-sulfamoylquinolyl)methyl]-1H-1,2,3-triazol-1-yl]propanoate (9c)

## Compound Spectrum List Report

### Analysis Info

Analysis Name D:\Data\KMBuyl.d  
Method low\_mass.m  
Sample Name TM Low concentration  
Comment

Operator KM  
Instrument impact II 1825265.10082

### Acquisition Parameter

|             |          |                      |          |                  |           |
|-------------|----------|----------------------|----------|------------------|-----------|
| Source Type | ESI      | Ion Polarity         | Positive | Set Nebulizer    | 0.3 Bar   |
| Focus       | Active   | Set Capillary        | 4000 V   | Set Dry Heater   | 240 °C    |
| Scan Begin  | 100 m/z  | Set End Plate Offset | -500 V   | Set Dry Gas      | 4.0 l/min |
| Scan End    | 1000 m/z | Set Charging Voltage | 2000 V   | Set Divert Valve | Source    |
|             |          | Set Corona           | 0 nA     | Set APCI Heater  | 0 °C      |

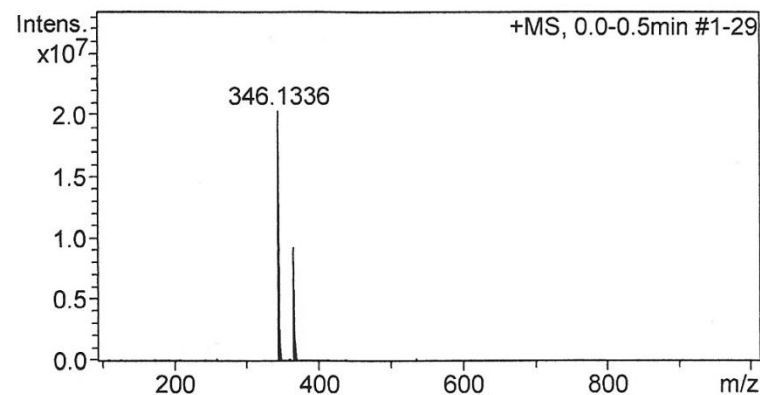

| # | m/z      | Res.  | S/N     | I        | I %   | FWHM   |
|---|----------|-------|---------|----------|-------|--------|
| 1 | 346.1336 | 20957 | 86756.1 | 20377468 | 100.0 | 0.0165 |
| 2 | 368.1154 | 43608 | 36143.5 | 9331787  | 45.8  | 0.0084 |

Figure S26 . HR MS spectra of 8-N-[[1-(1-butyl)-1H-1,2,3-triazol-4-yl]methyl]quinolinesulfonamide (**9d**)

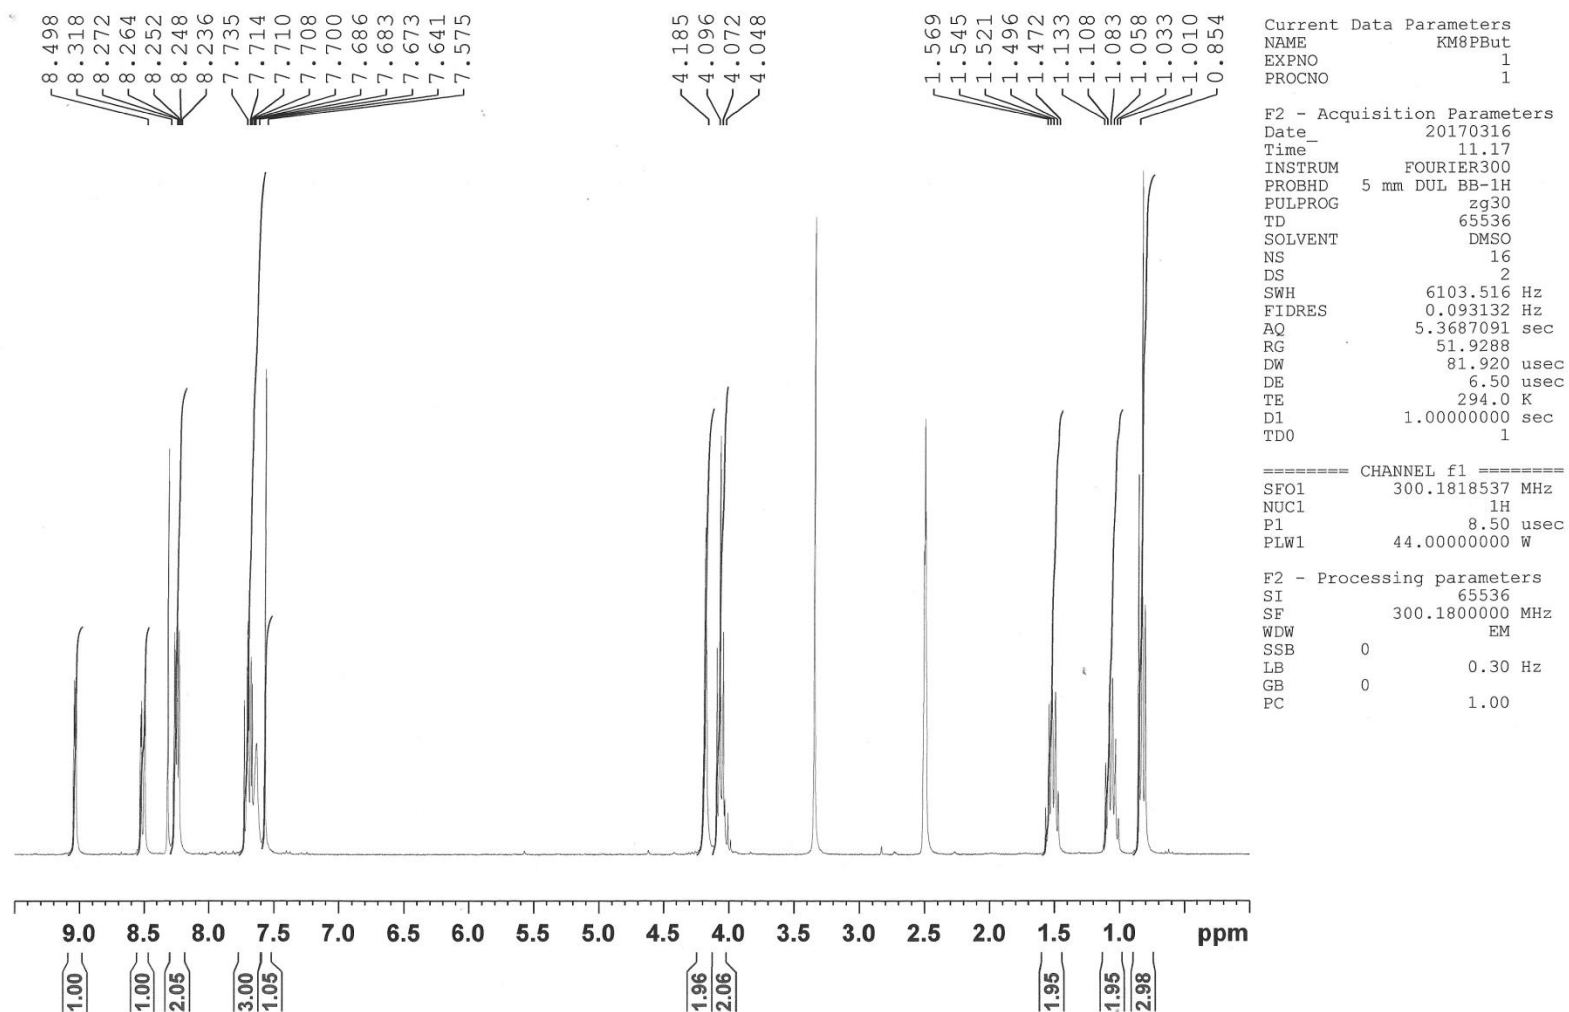

Figure S27 . <sup>1</sup>H NMR spectra of 8-N-[[1-(1-butyl)-1H-1,2,3-triazol-4-yl]methyl]quinolinesulfonamide (**9d**)

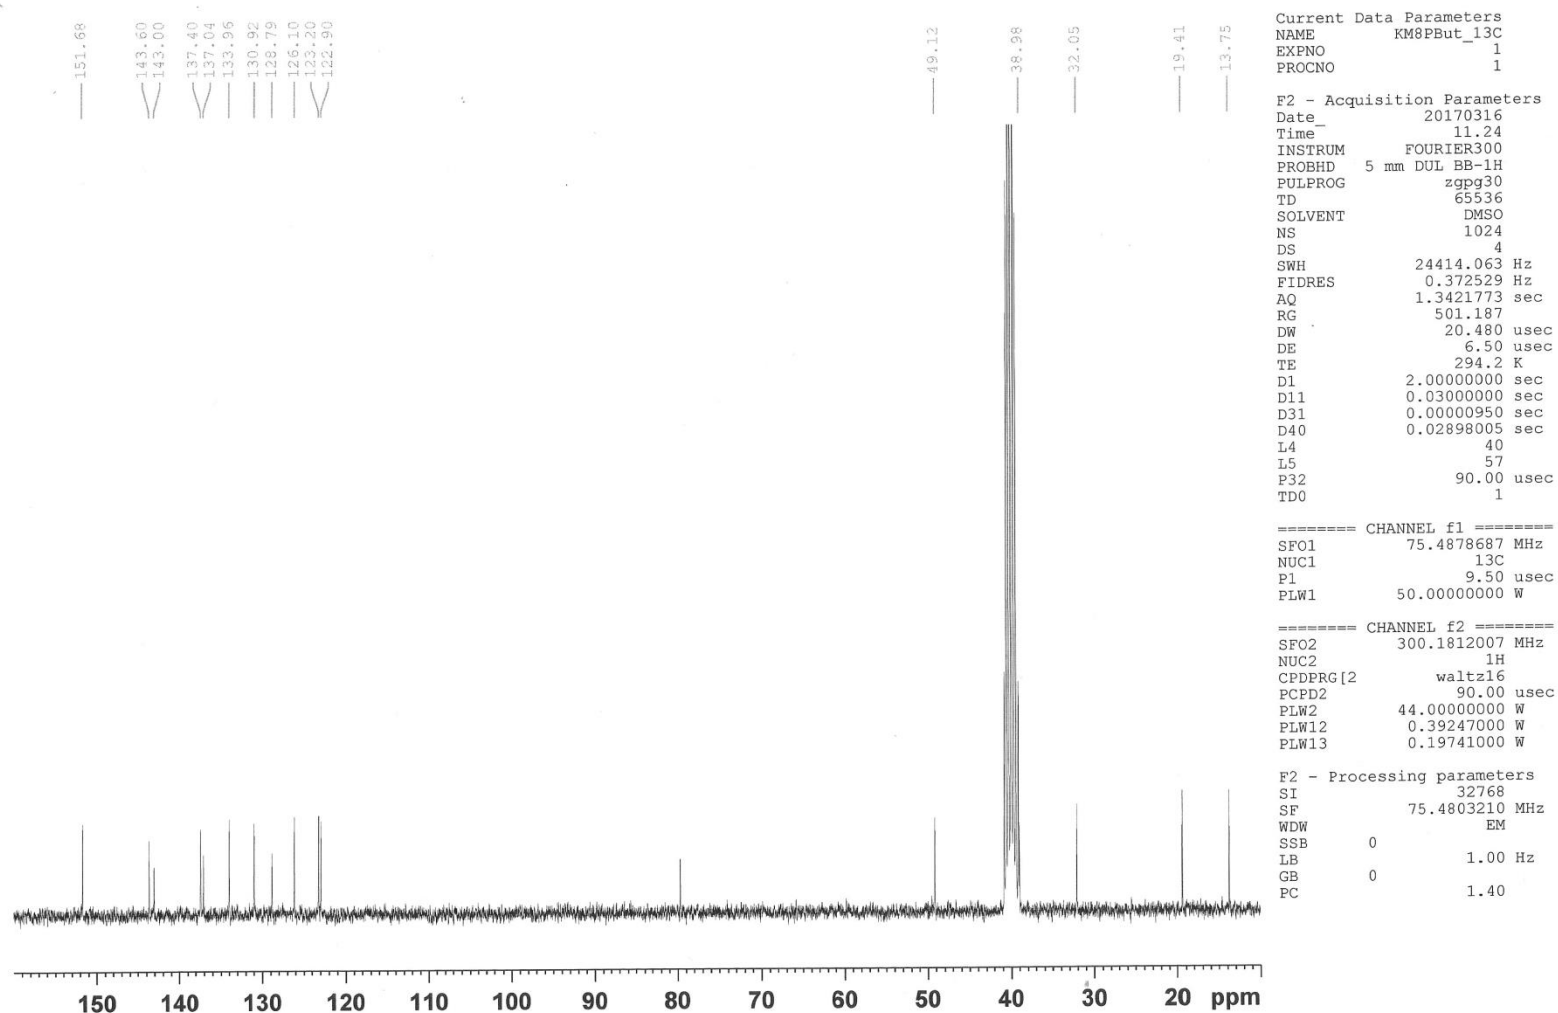

Figure S28.  $^{13}\text{C}$  NMR spectra of 8-*N*-[[1-(1-butyl)-1*H*-1,2,3-triazol-4-yl]methyl]quinolinesulfonamide (9d)

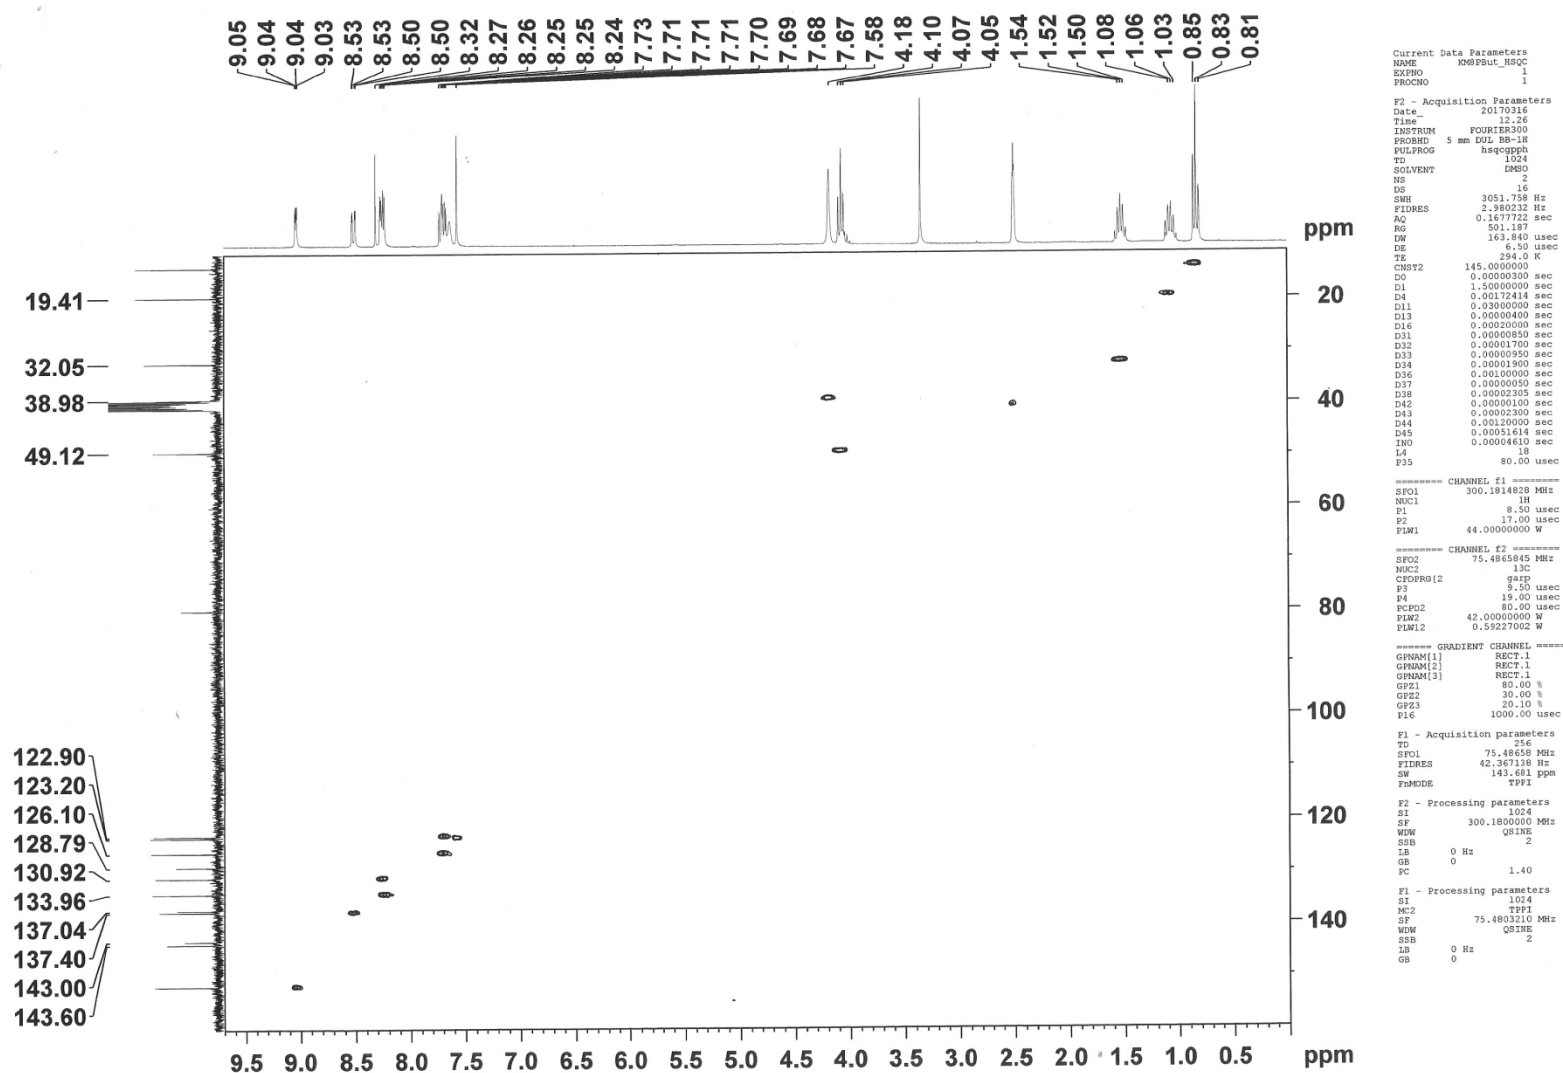

Figure S29. HSQC spectra of 8-N-[[1-(1-butyl)-1H-1,2,3-triazol-4-yl]methyl]quinolinesulfonamide (9d)

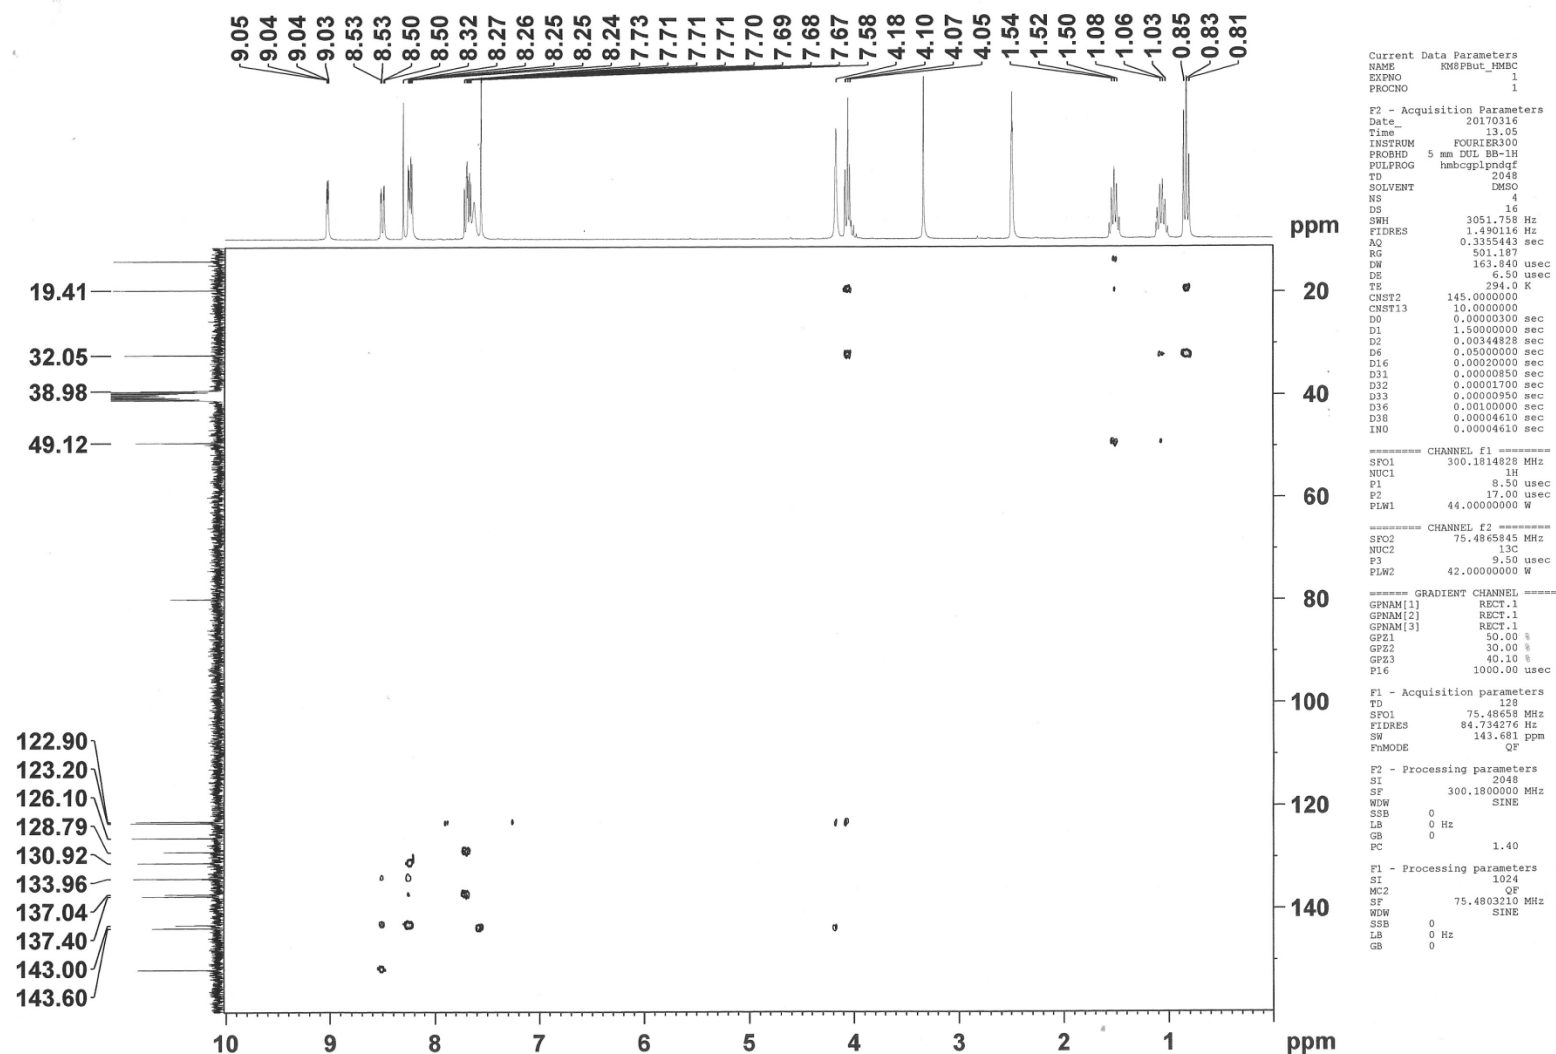

Figure S30. HMBC spectra of 8-N-[[1-(1-butyl)-1H-1,2,3-triazol-4-yl]methyl]quinolinesulfonamide (9d)

## Compound Spectrum List Report

### Analysis Info

Analysis Name D:\Data\KMMeBetulinaPositive.d

Method low\_mass.m

Sample Name TM Low concentration

Comment

Operator KM

Instrument impact II

1825265.10082

### Acquisition Parameter

Source Type ESI

Ion Polarity

Positive

Set Nebulizer

0.3 Bar

Focus Active

Set Capillary

4000 V

Set Dry Heater

240 °C

Scan Begin 100 m/z

Set End Plate Offset

-500 V

Set Dry Gas

4.0 l/min

Scan End 1000 m/z

Set Charging Voltage

2000 V

Set Divert Valve

Source

Set Corona

0 nA

Set APCI Heater

0 °C

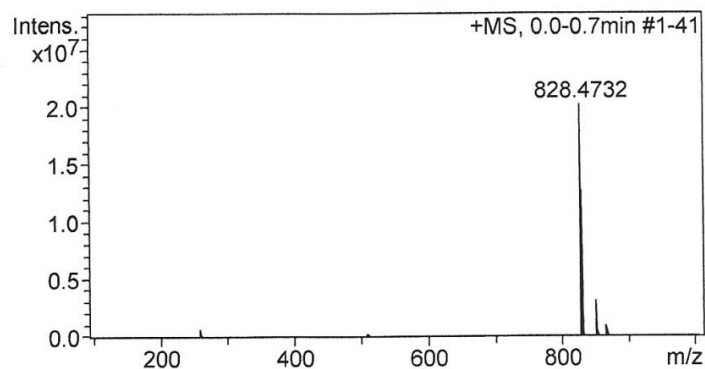

| # | m/z      | Res.  | S/N     | I        | I %   | FWHM   |
|---|----------|-------|---------|----------|-------|--------|
| 1 | 828.4732 | 36740 | 57187.3 | 20214546 | 100.0 | 0.0225 |
| 2 | 850.4540 | 54137 | 9022.8  | 3173013  | 15.7  | 0.0157 |
| 3 | 866.4274 | 43927 | 2836.8  | 980902   | 4.9   | 0.0197 |

**Figure S31.** HR MS spectra of 8-*N*-methyl-*N*-({1-[3 $\beta$ , 28-diacetoxylup-20(29)-en-30-yl]-1*H*-1,2,3-triazol-4-yl)methyl}-quinolinesulfonamide (**9e**)



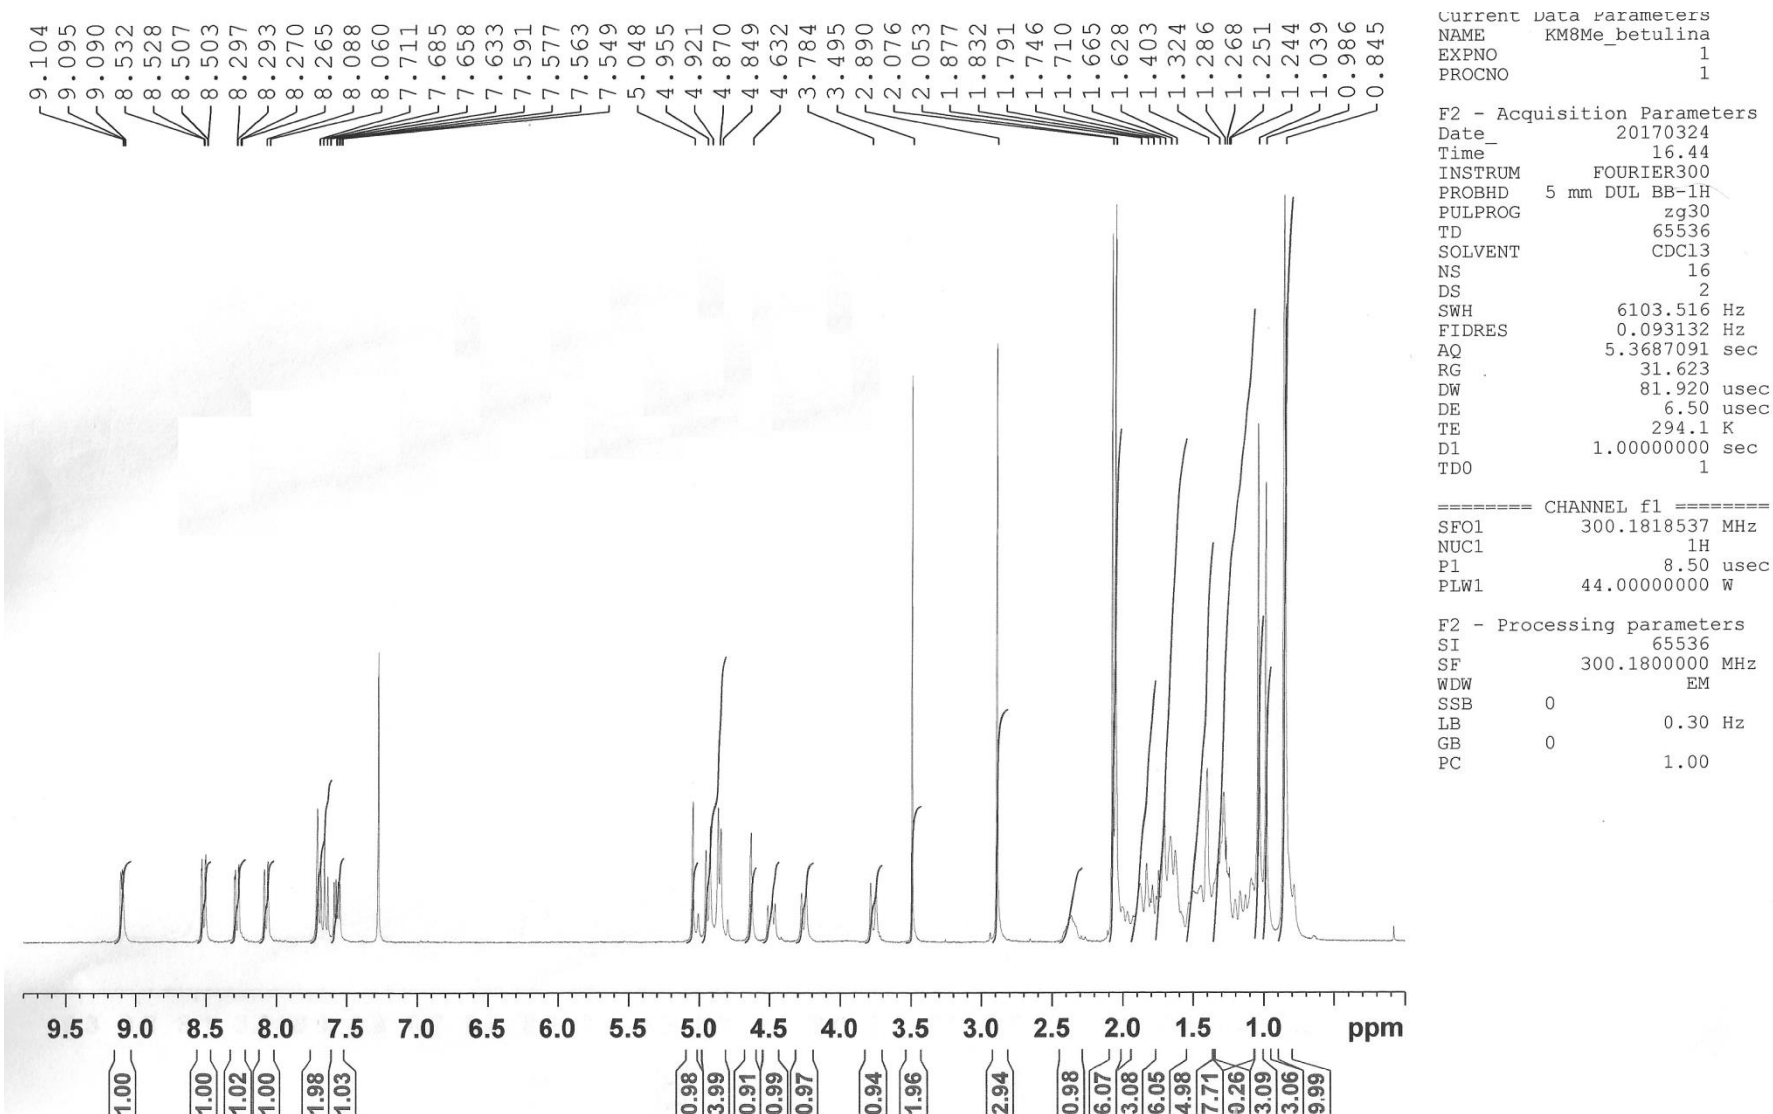

**Figure S32.**  $^1\text{H}$  NMR spectra of 8-*N*-methyl-*N*-((1-[3 $\beta$ , 28-diacetoxylup-20(29)-en-30-yl]-1*H*-1,2,3-triazol-4-yl)methyl)-quinolinesulfonamide (**9e**)

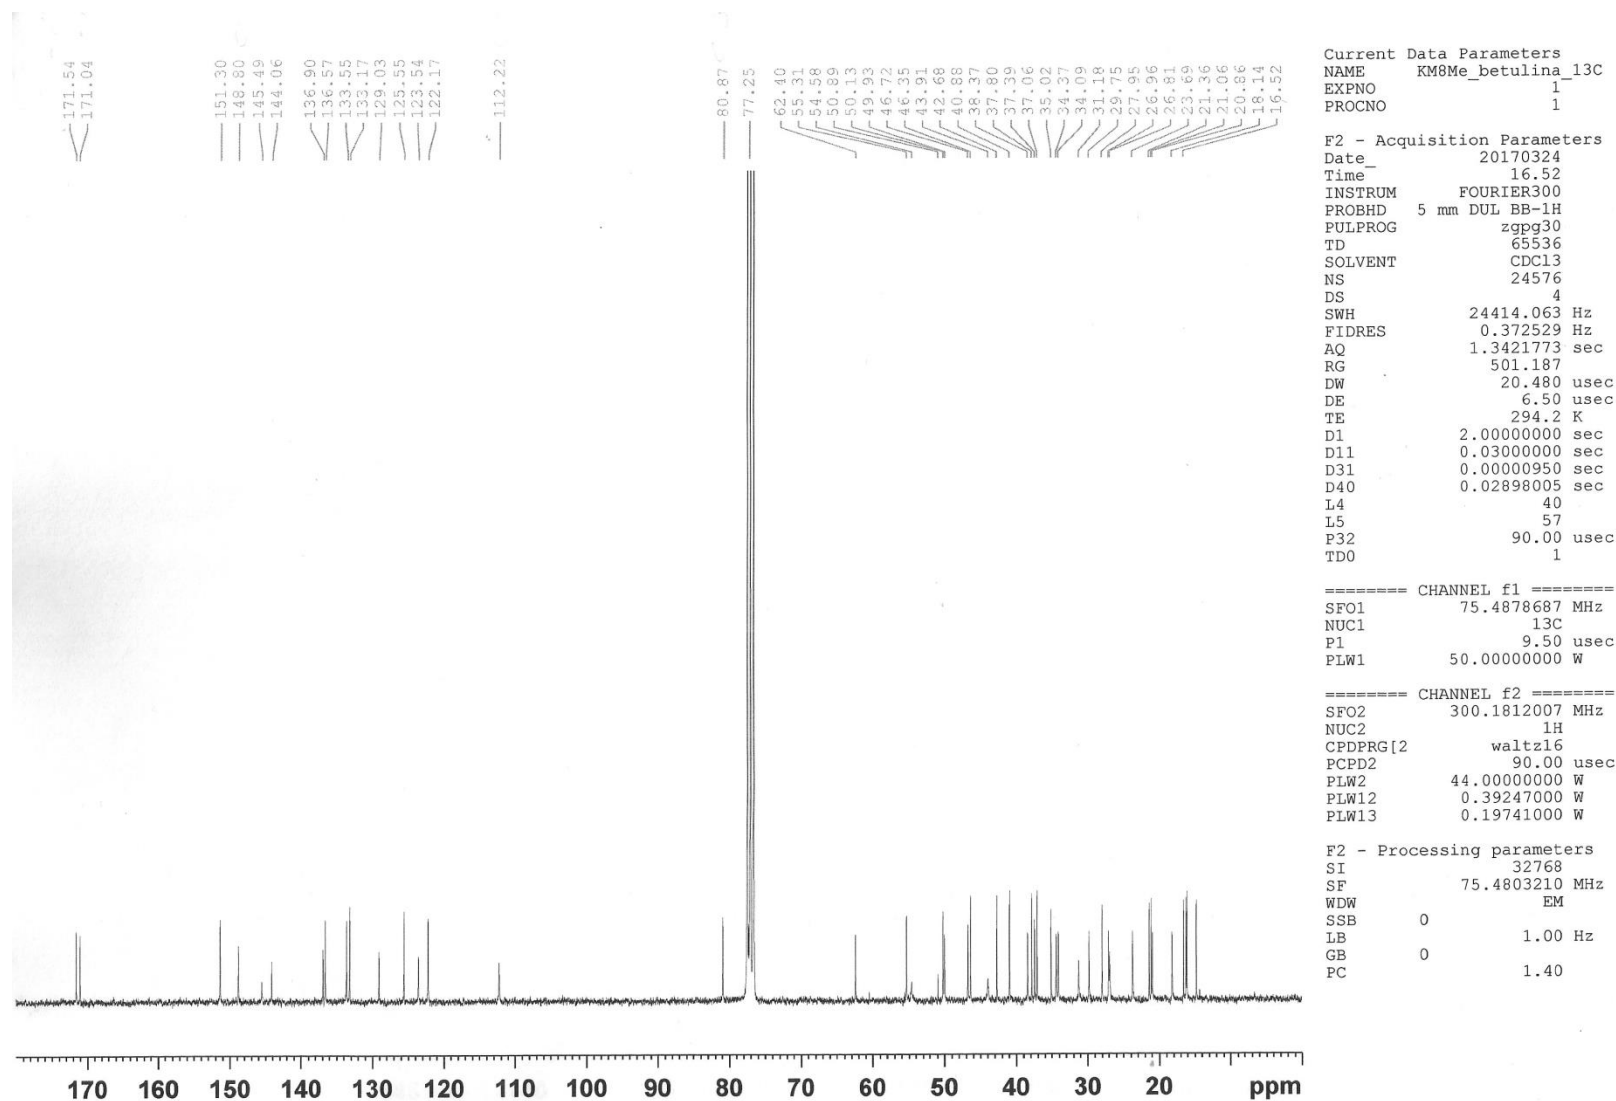

Figure S33 . <sup>13</sup>C NMR spectra of 8-*N*-methyl-*N*-((1-[3β, 28-diacetoxylup-20(29)-en-30-yl]-1*H*-1,2,3-triazol-4-yl)methyl)-quinolinesulfonamide (9e)

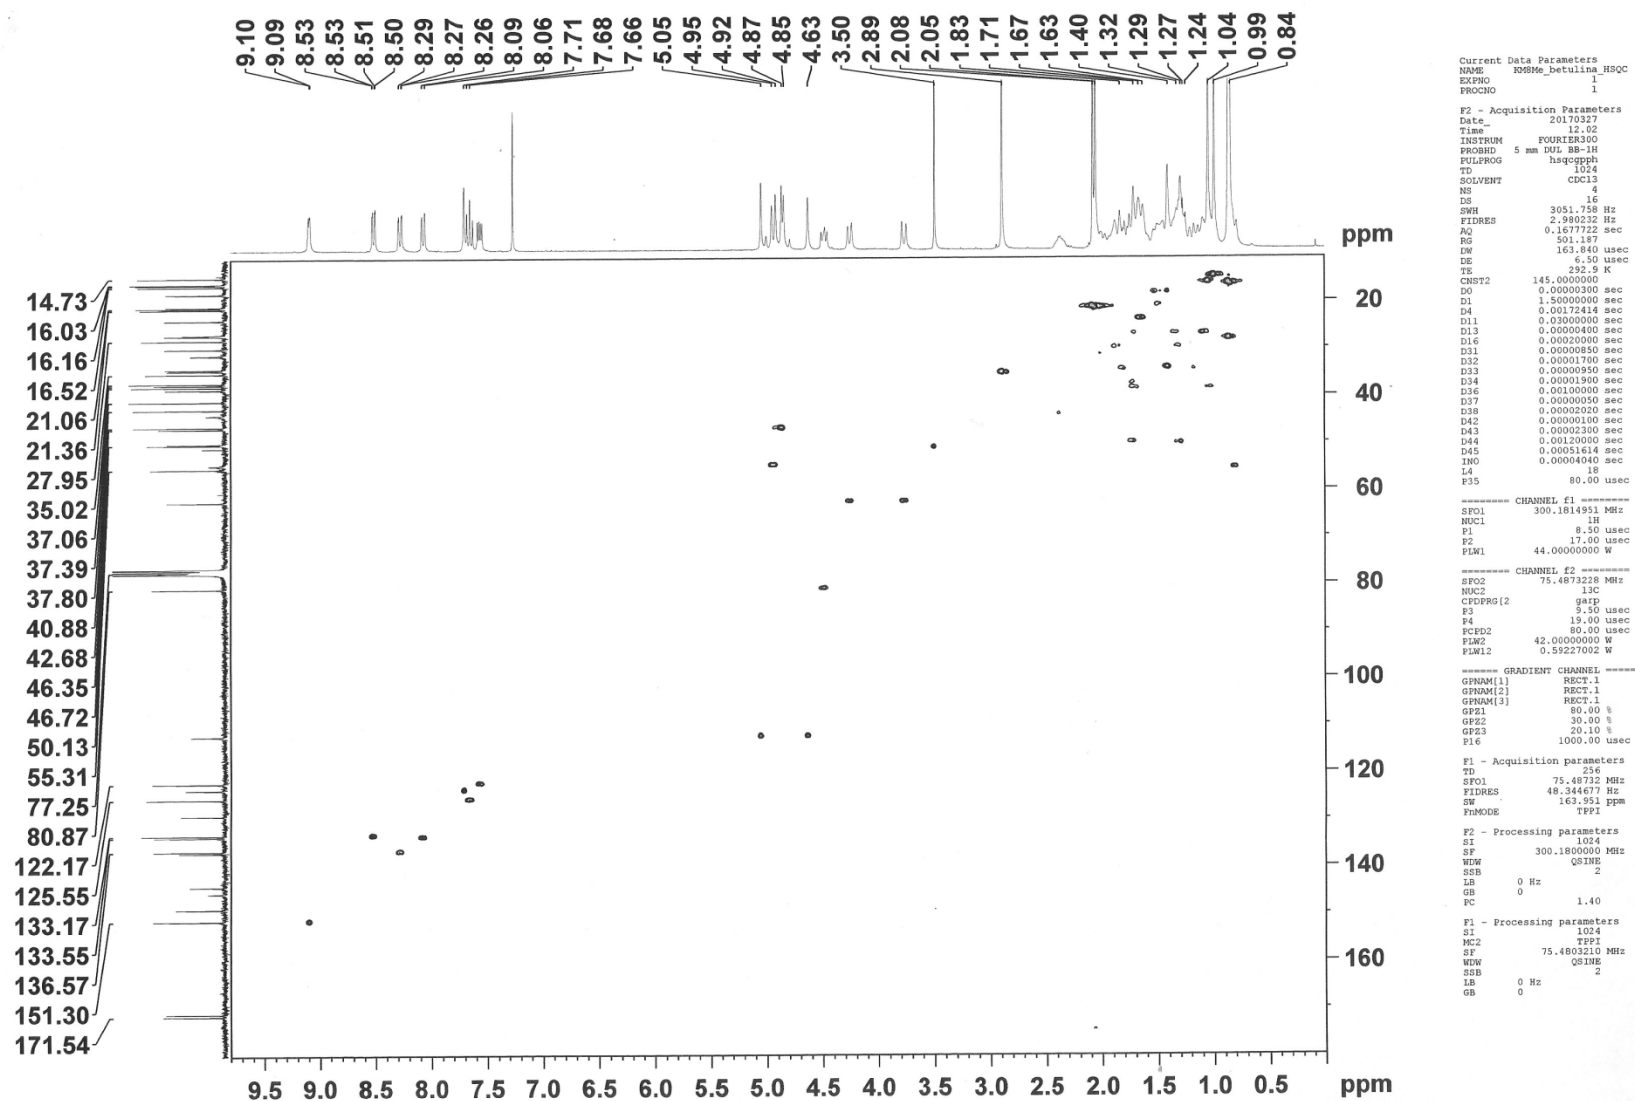

Figure S34 . HSQC spectra of 8-*N*-methyl-*N*-((1-[3 $\beta$ , 28-diacetoxylup-20(29)-en-30-yl]-1*H*-1,2,3-triazol-4-yl)methyl)-quinolinesulfonamide (**9e**)

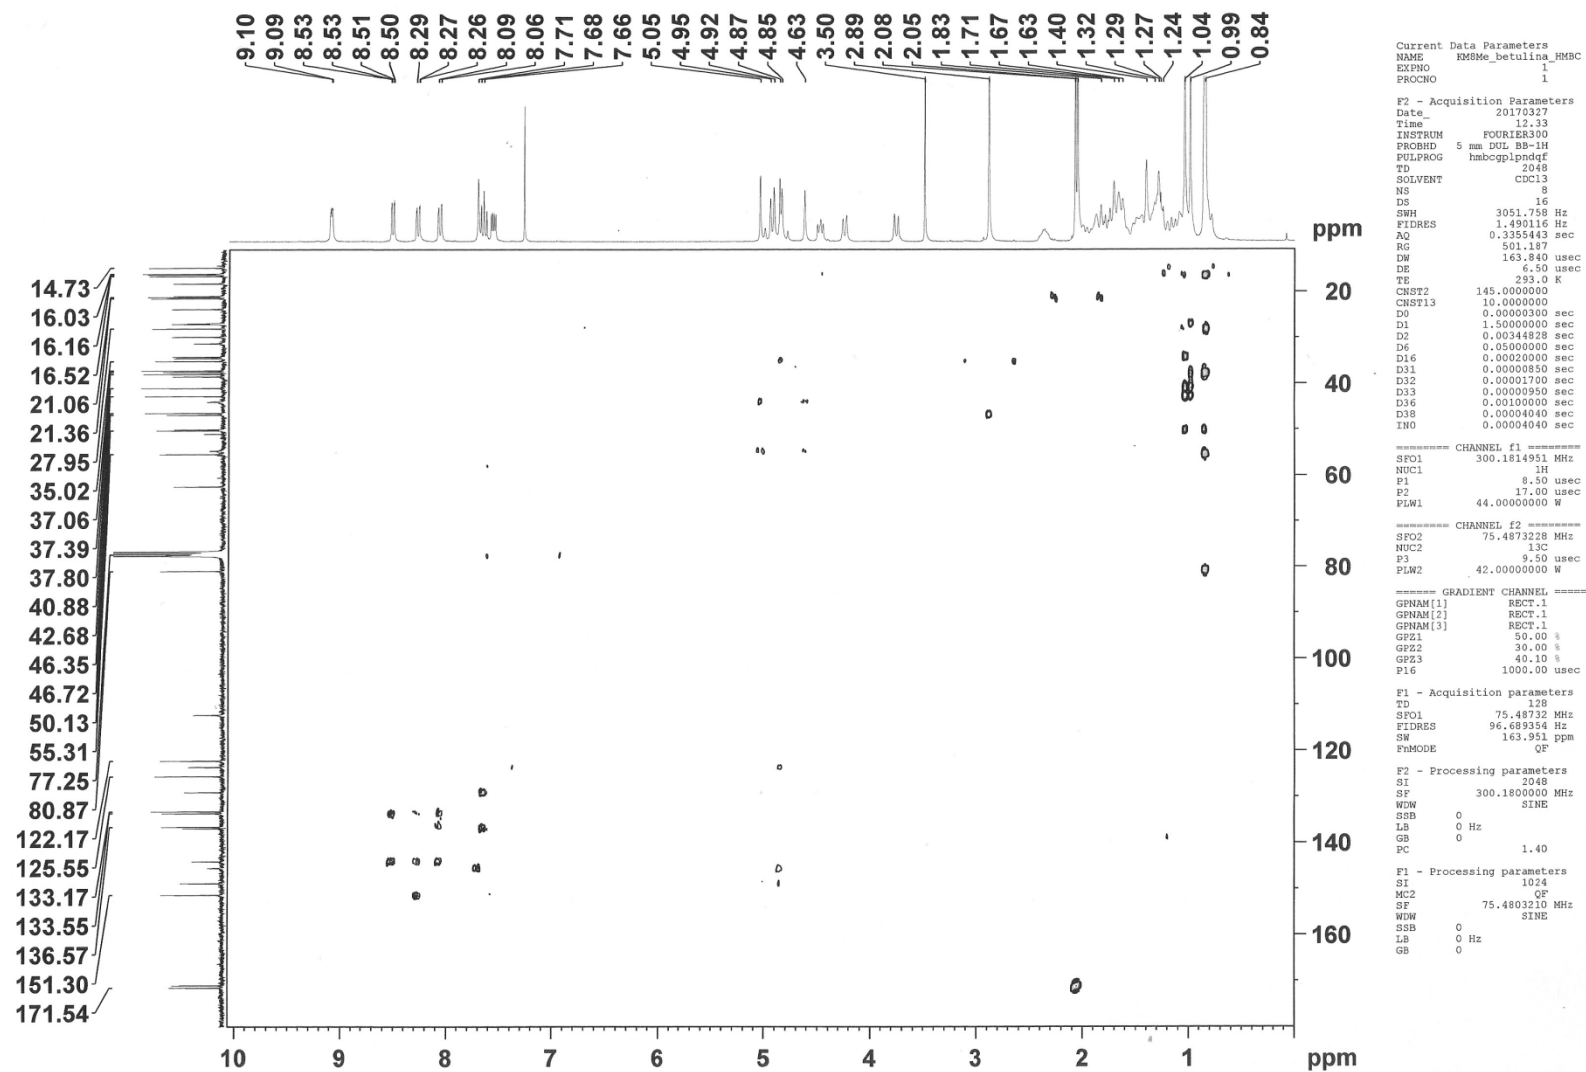

Figure S35 . HMBC spectra of 8-*N*-methyl-*N*-([1-[ $\beta$ , 28-diacetoxylup-20(29)-en-30-yl]-1*H*-1,2,3-triazol-4-yl)methyl]-quinolinesulfonamide (**9e**)

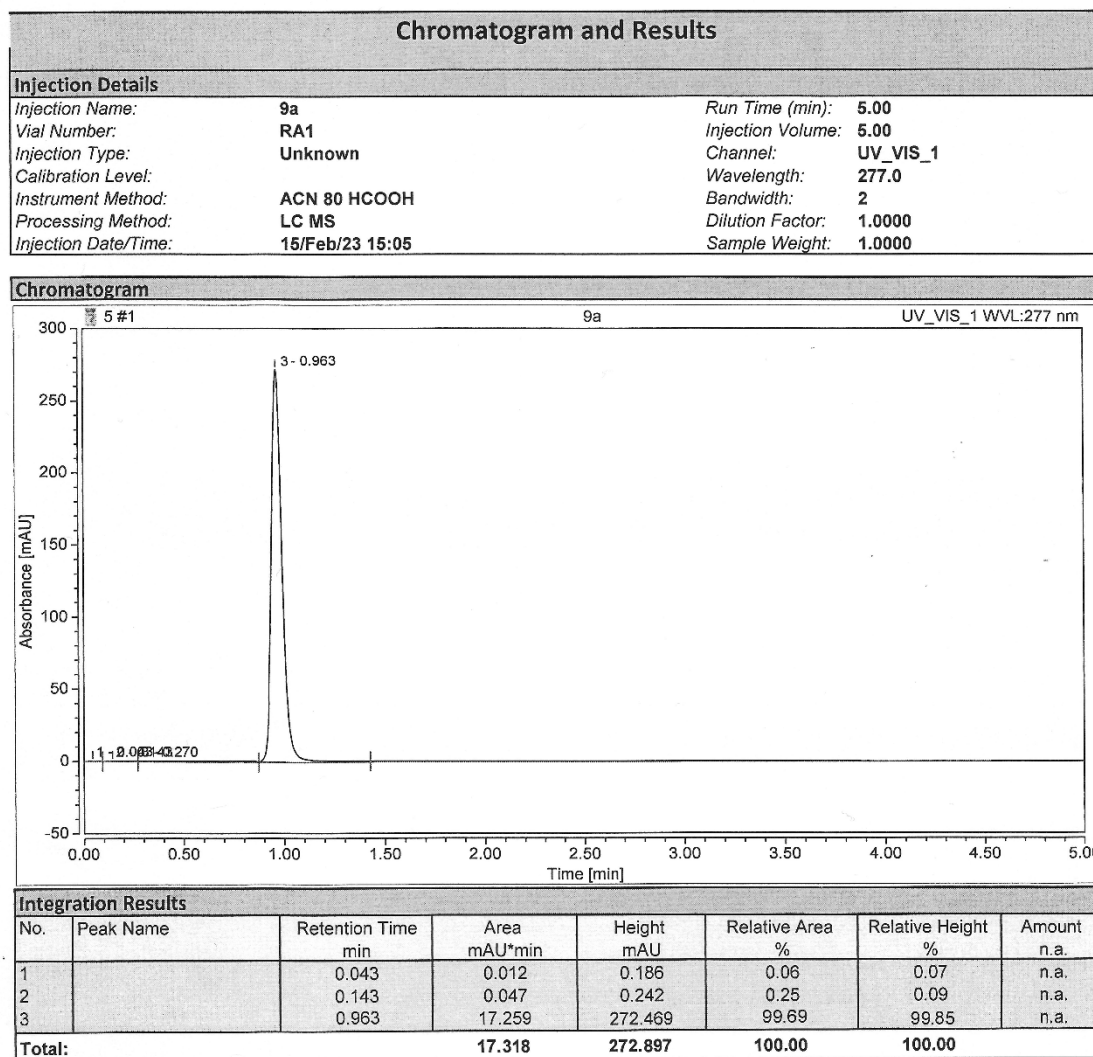

Default DAD/Integration

Chromeleon (c) Dionex  
Version 7.2.2.6686

**Figure S36.** HPLC analysis of 8-*N*-{[1-(7-chloroquinolin-4-yl)-1*H*-1,2,3-triazol-4-yl]methyl}quinolinesulfonamide (**9a**)

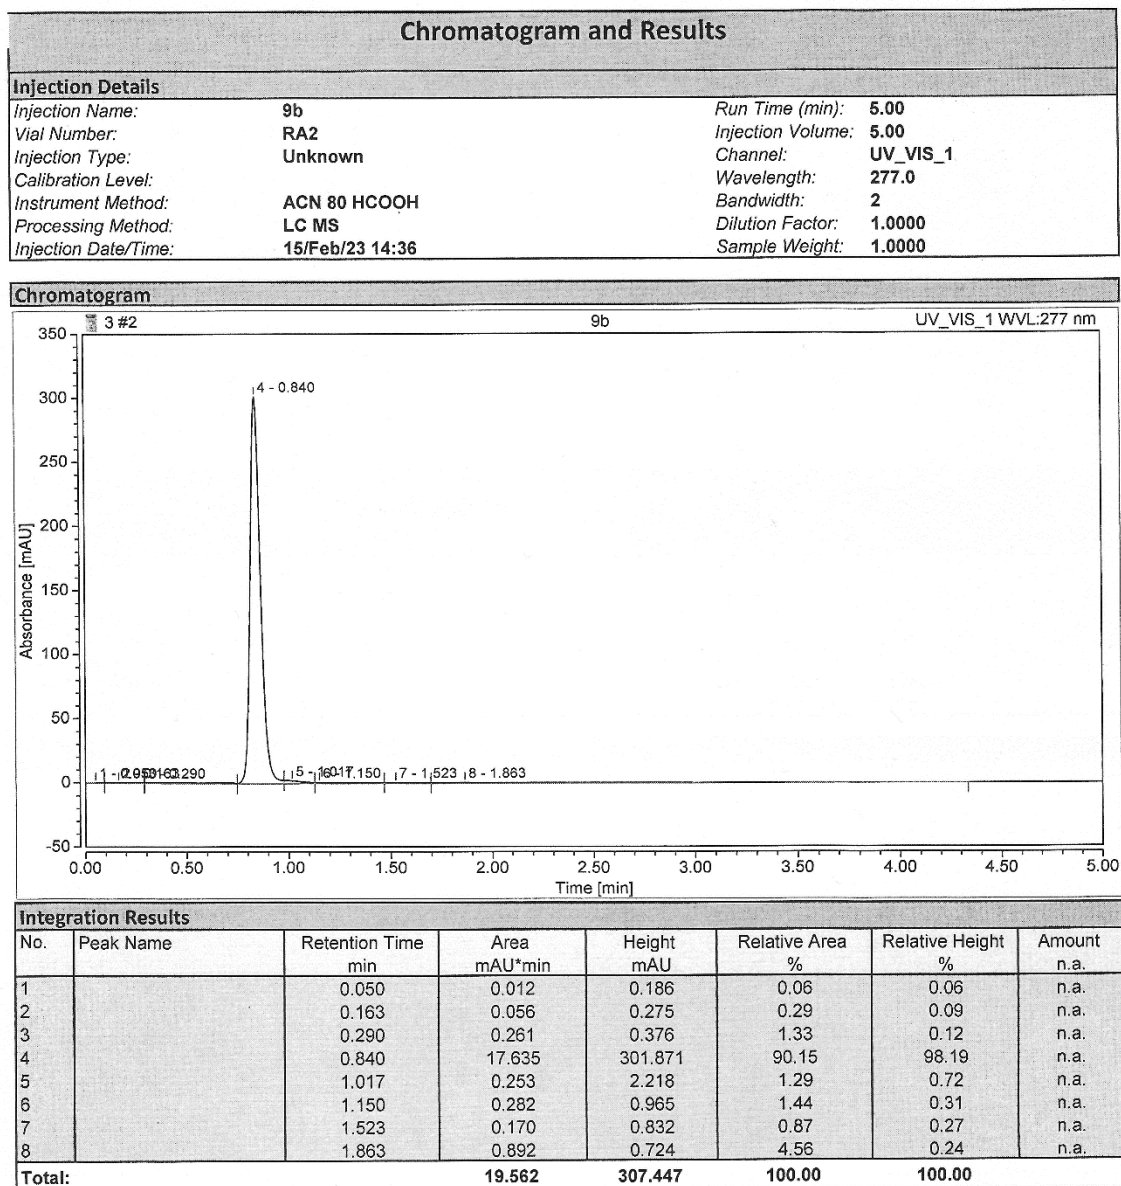

Default DAD/Integration

Chromleon (c) Dionex  
Version 7.2.2.6686**Figure S37.** diethyl 2-{4-[methyl-(8-sulfamoylquinolyl)-1H-1,2,3-triazol-1-yl]}ethylphosphonate (**9b**)

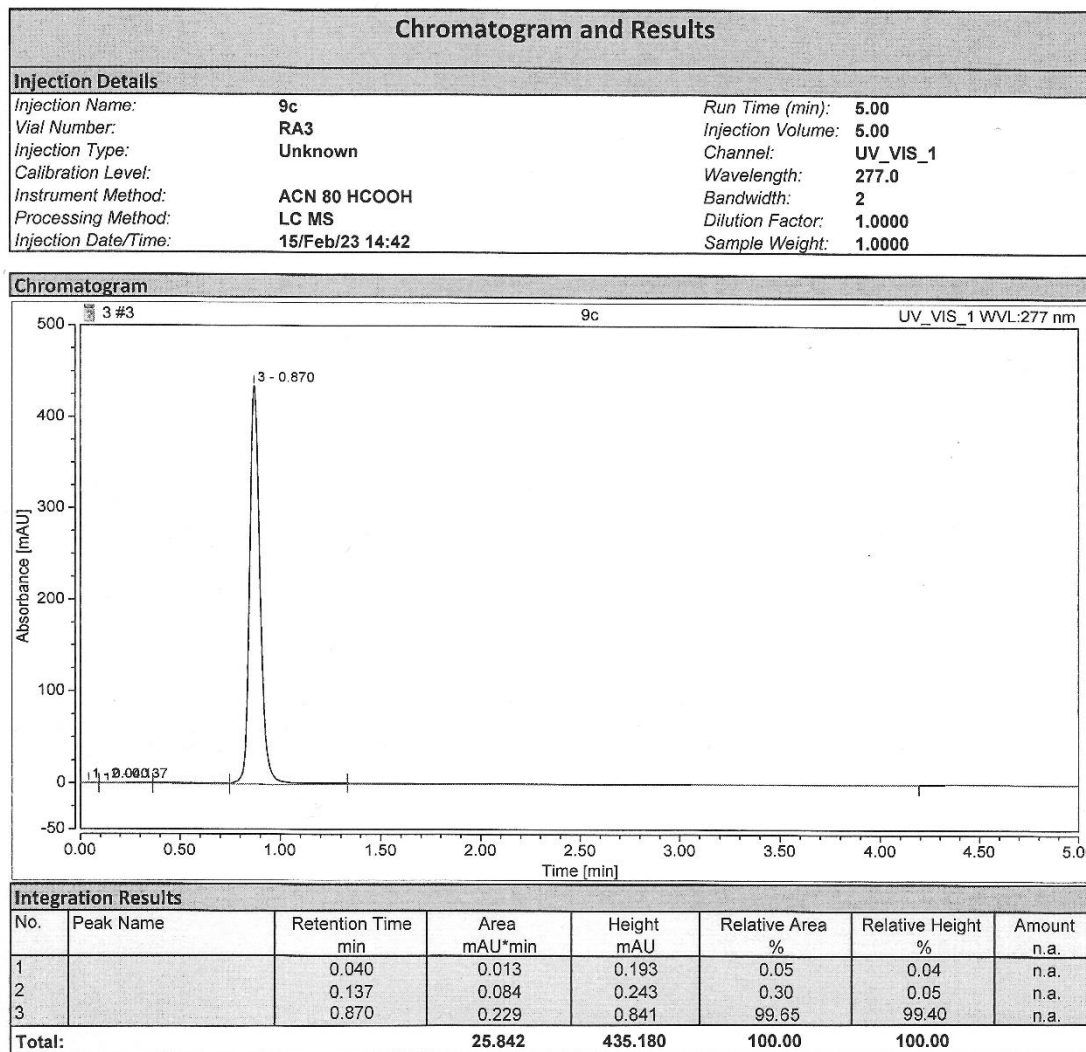

Default DAD/Integration

Chromeleon (c) Dionex  
Version 7.2.2.6686**Figure S38.** ethyl 3-[[4-(8-sulfamoylquinolyl)methyl]-1*H*-1,2,3-triazol-1-yl]propanoate (**9c**)

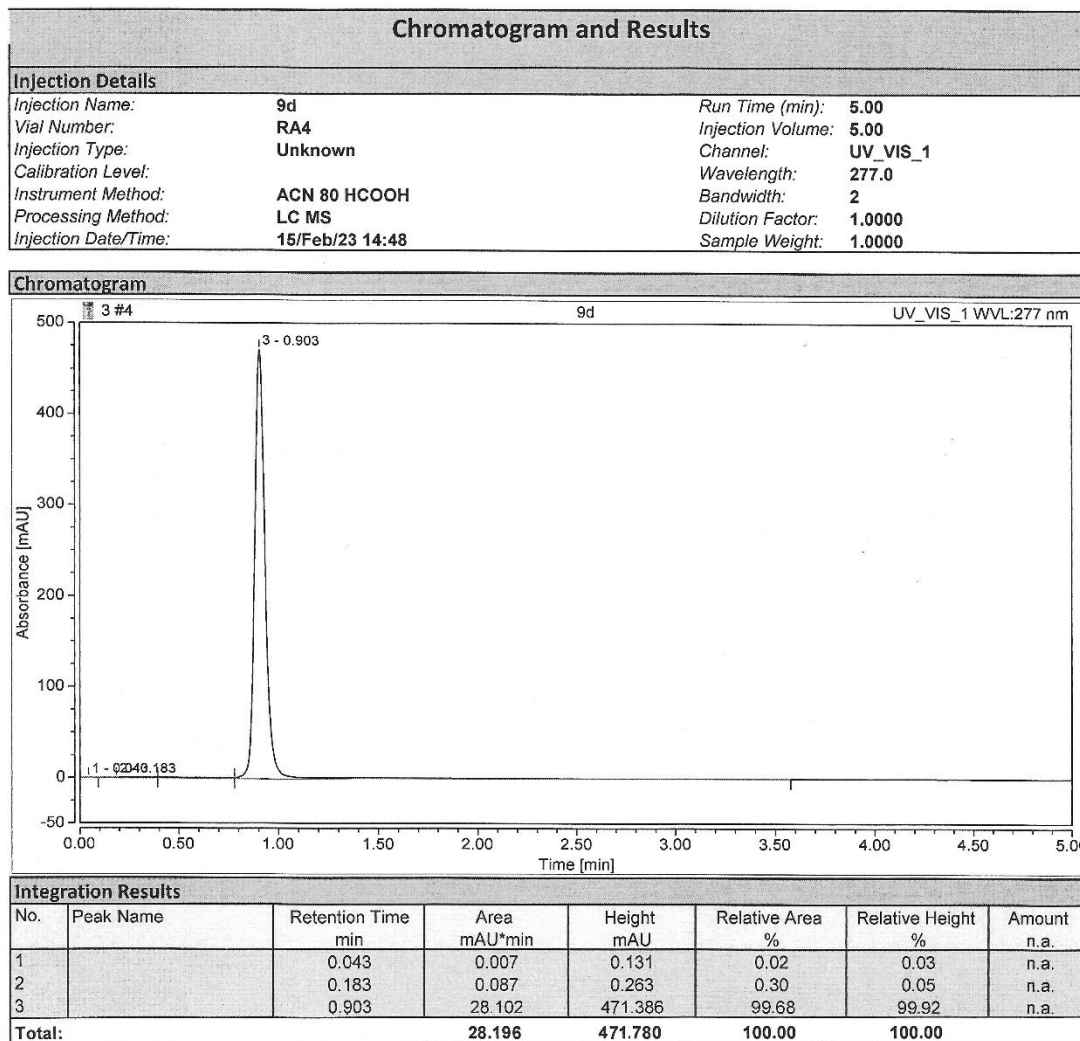

Default DAD/Integration

Chromeleon (c) Dionex  
Version 7.2.2.6686**Figure S39.** 8-*N*-{[1-(1-butyl)-1*H*-1,2,3-triazol-4-yl]methyl}quinolinesulfonamide (9d)



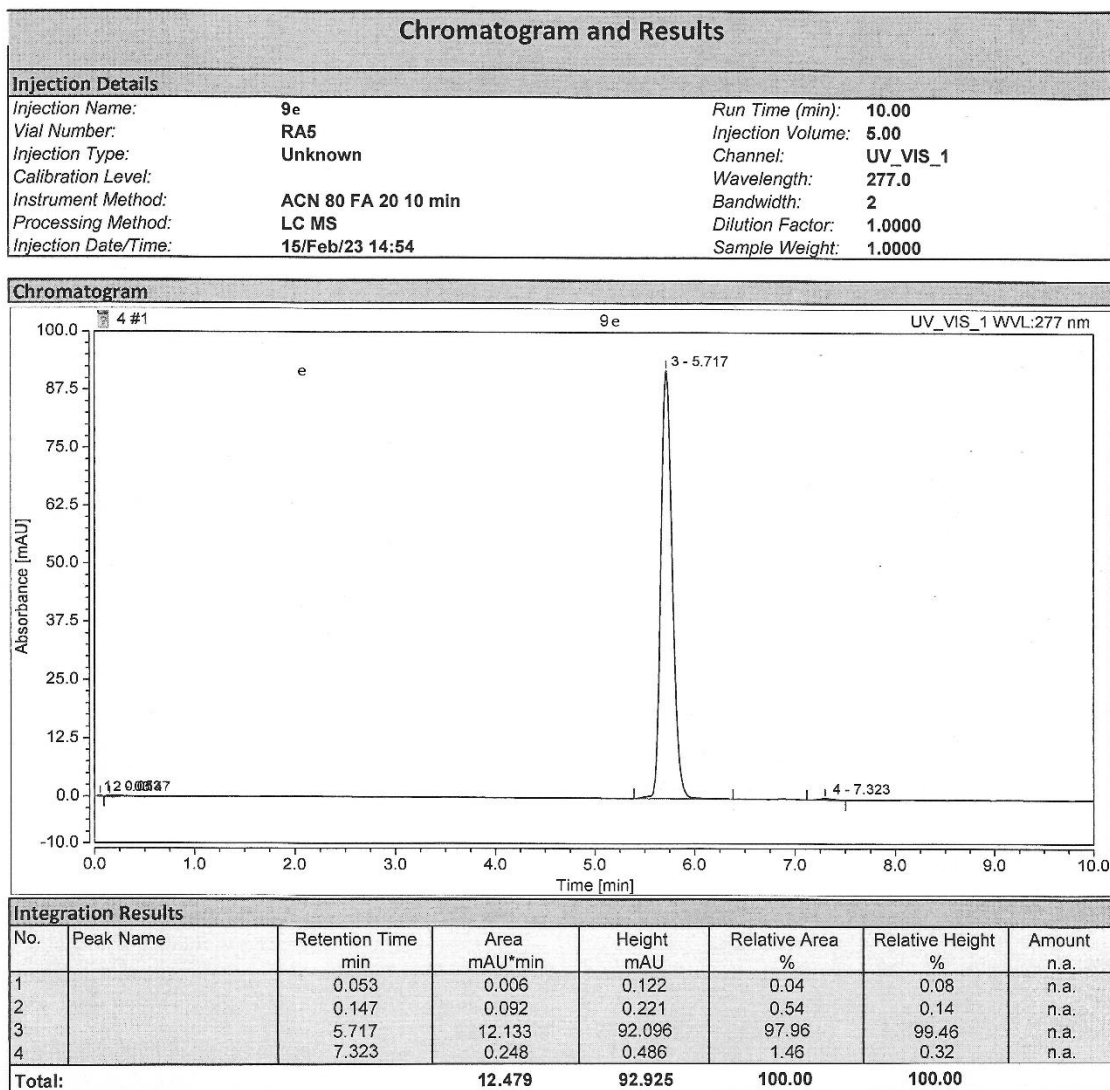

Default DAD/Integration

Chromeleon (c) Dionex  
Version 7.2.2.6586

**Figure S40.** 8-N-methyl-N-((1-[3 $\beta$ , 28-diacetoxylup-20(29)-en-30-yl]-1H-1,2,3-triazol-4-yl)methyl)-quinolinesulfonamide (**9e**)
